# Supplementary material for: Comparative motif discovery combined with comparative transcriptomics yields accurate targetome and enhancer predictions
Source: HighWire-hosted journal article supplement (doi:10.1101/gr.140426.112), 2012-10-15
Supplement: Supplemental_Material.pdf [file Supplemental_Material.pdf]

## Supplementary Material

### **Comparative motif discovery combined with comparative transcriptomics yield accurate targetome and enhancer predictions**

Marina Naval Sanchez<sup>1</sup>, Delphine Potier<sup>1</sup>, Lotte Haagen<sup>1</sup>, Máximo Sánchez<sup>2</sup>, Sebastian Munck<sup>3</sup>, Bram Van de Sande<sup>1</sup>, Fernando Casares<sup>2</sup>, Valerie Christiaens<sup>1</sup>, and Stein Aerts<sup>1</sup> <sup>#</sup>

<sup>1</sup> Laboratory of Computational Biology, Department of Human Genetics, University of Leuven, Leuven, Belgium

<sup>2</sup> Centro Andaluz de Biología del Desarrollo (CABD) CSIC-UPO-Junta de Andalucía, Sevilla, Spain

<sup>3</sup> LiMoNe, VIB Center for the Biology of Disease, Leuven, Belgium

<sup>#</sup> Correspondence to Stein Aerts, Herestraat 49, PO Box 602, B-3000 Leuven, Belgium. Email: [stein.aerts@med.kuleuven.be](mailto:stein.aerts@med.kuleuven.be)

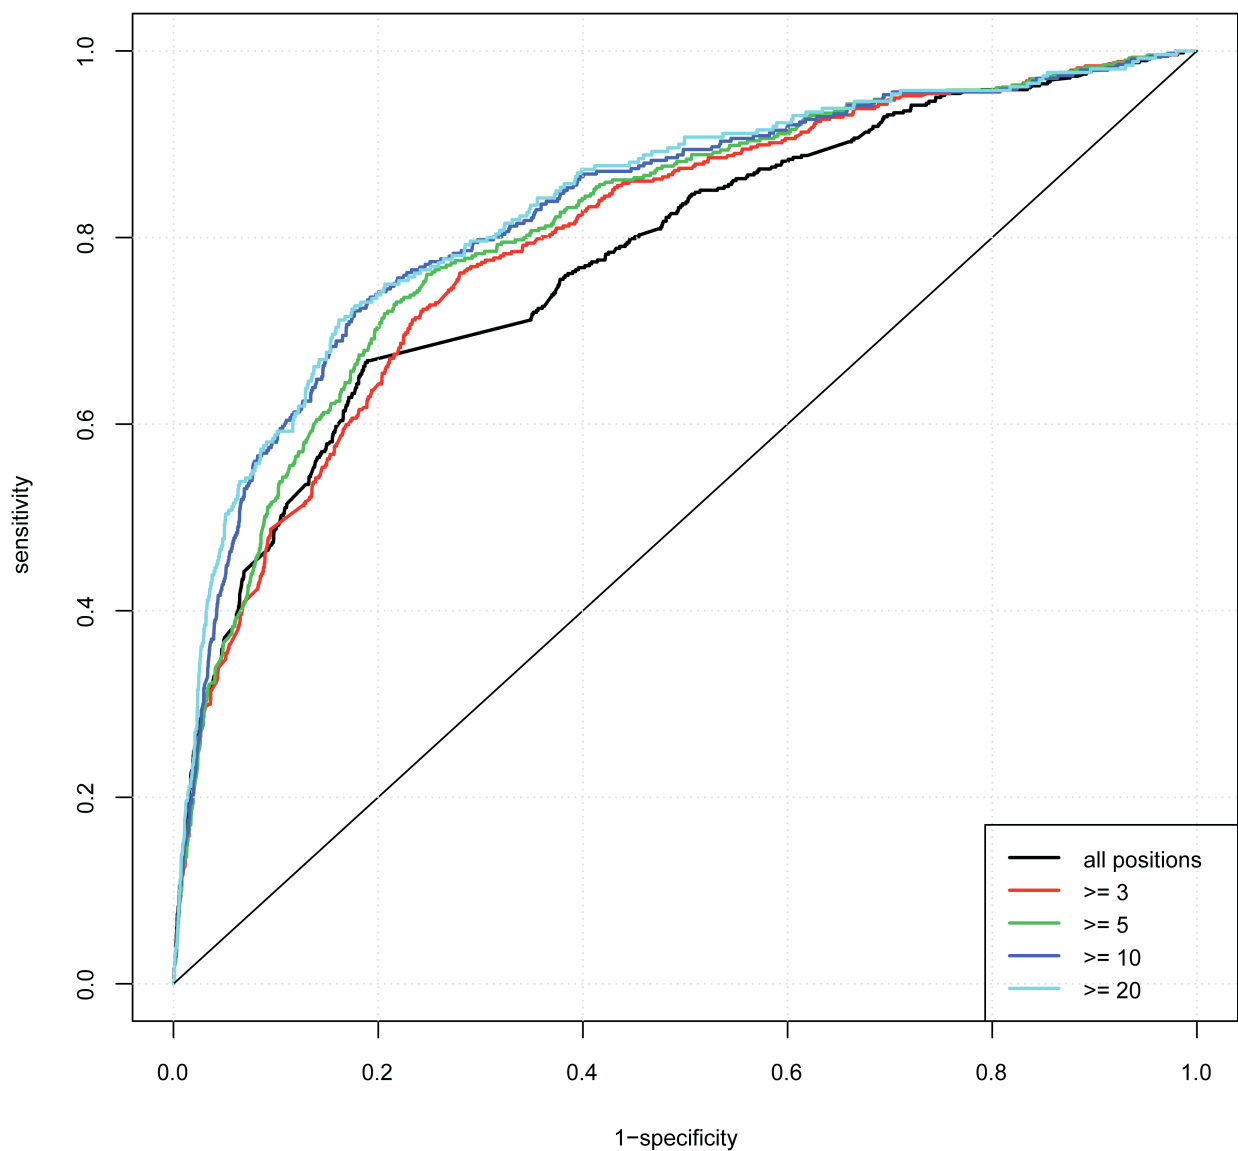

**Figure S1: Tag-seq filtering**

Comparison of different cutoff values for the minimal number of reads in at least one sample (eye-antennal or wing). X-axis represents the ranking of all genes according to the  $\log_2$  (eye/wing), using different filtering thresholds. Y-axis represents the sensitivity to recover the “true positives”, for which we used a set of 507 eye-enriched genes obtained by microarray data (Ostrin et al. 2006).

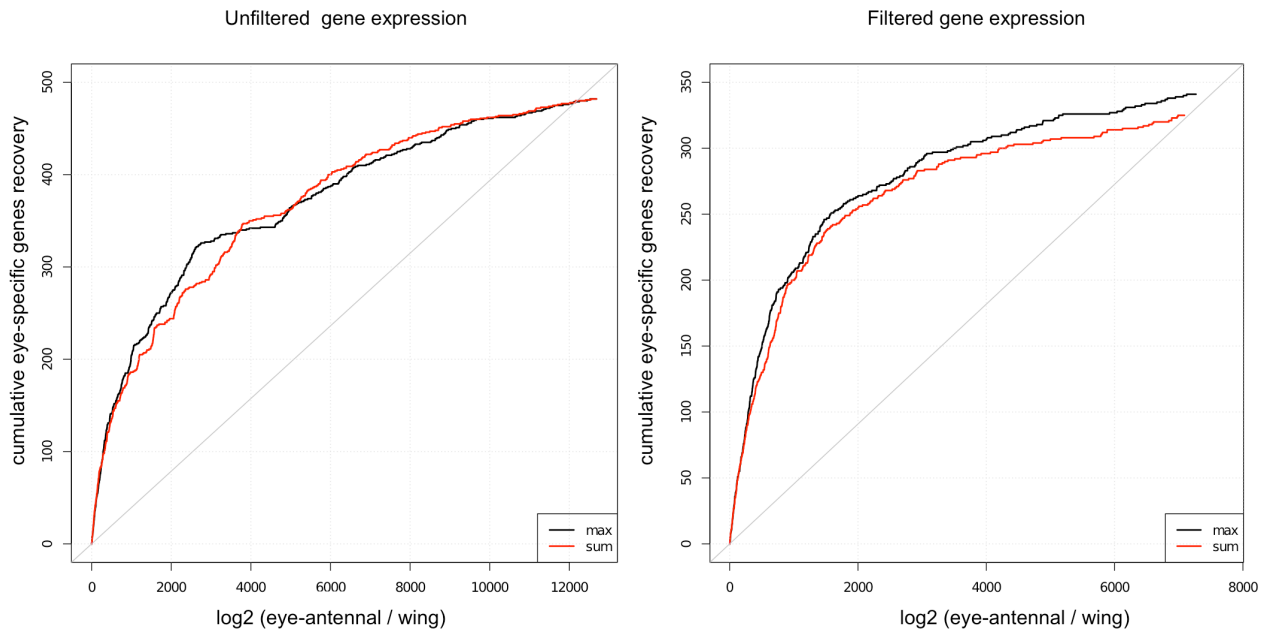

**Figure S2: Max versus Sum**

Comparison of using the max (peaks) for a gene to derive the expression value, or the sum of all peaks.

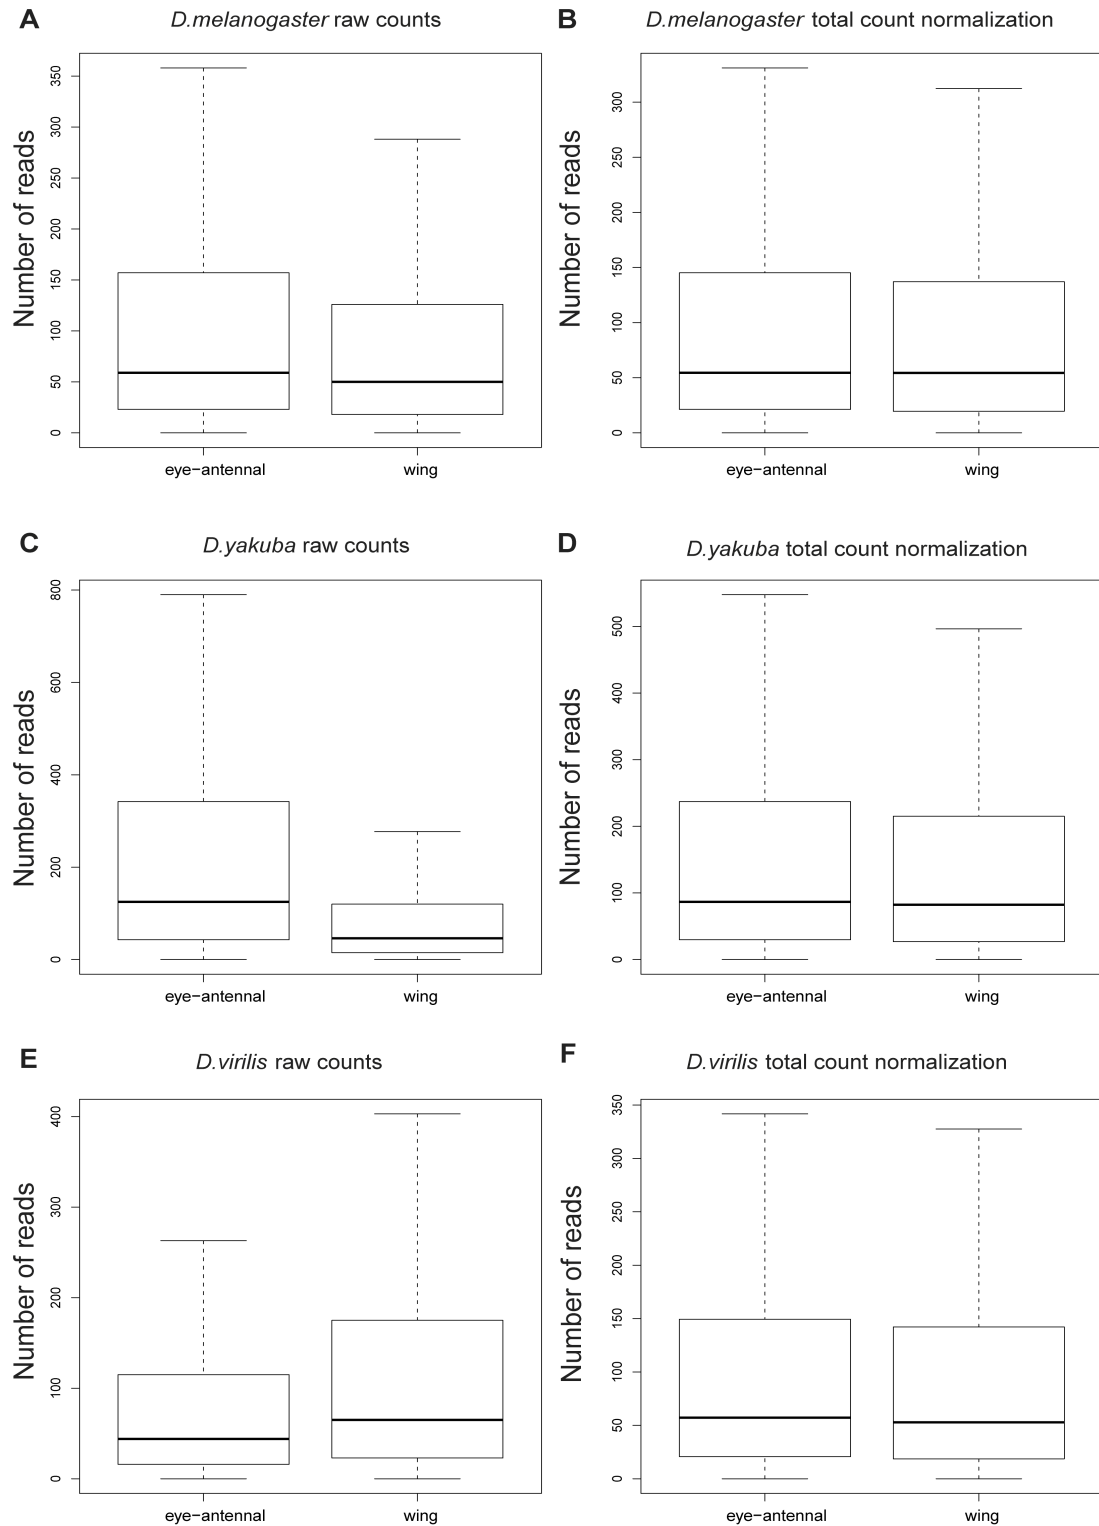

**Figure S3: Distribution of gene expression values before and after total-count normalization.** Boxplots from raw counts (A,C,E) and total-count normalized distributions (B,D,F) per species (A-B for *D. melanogaster*; C-D for *D. yakuba*; E-F for *D. virilis*) and tissue samples.



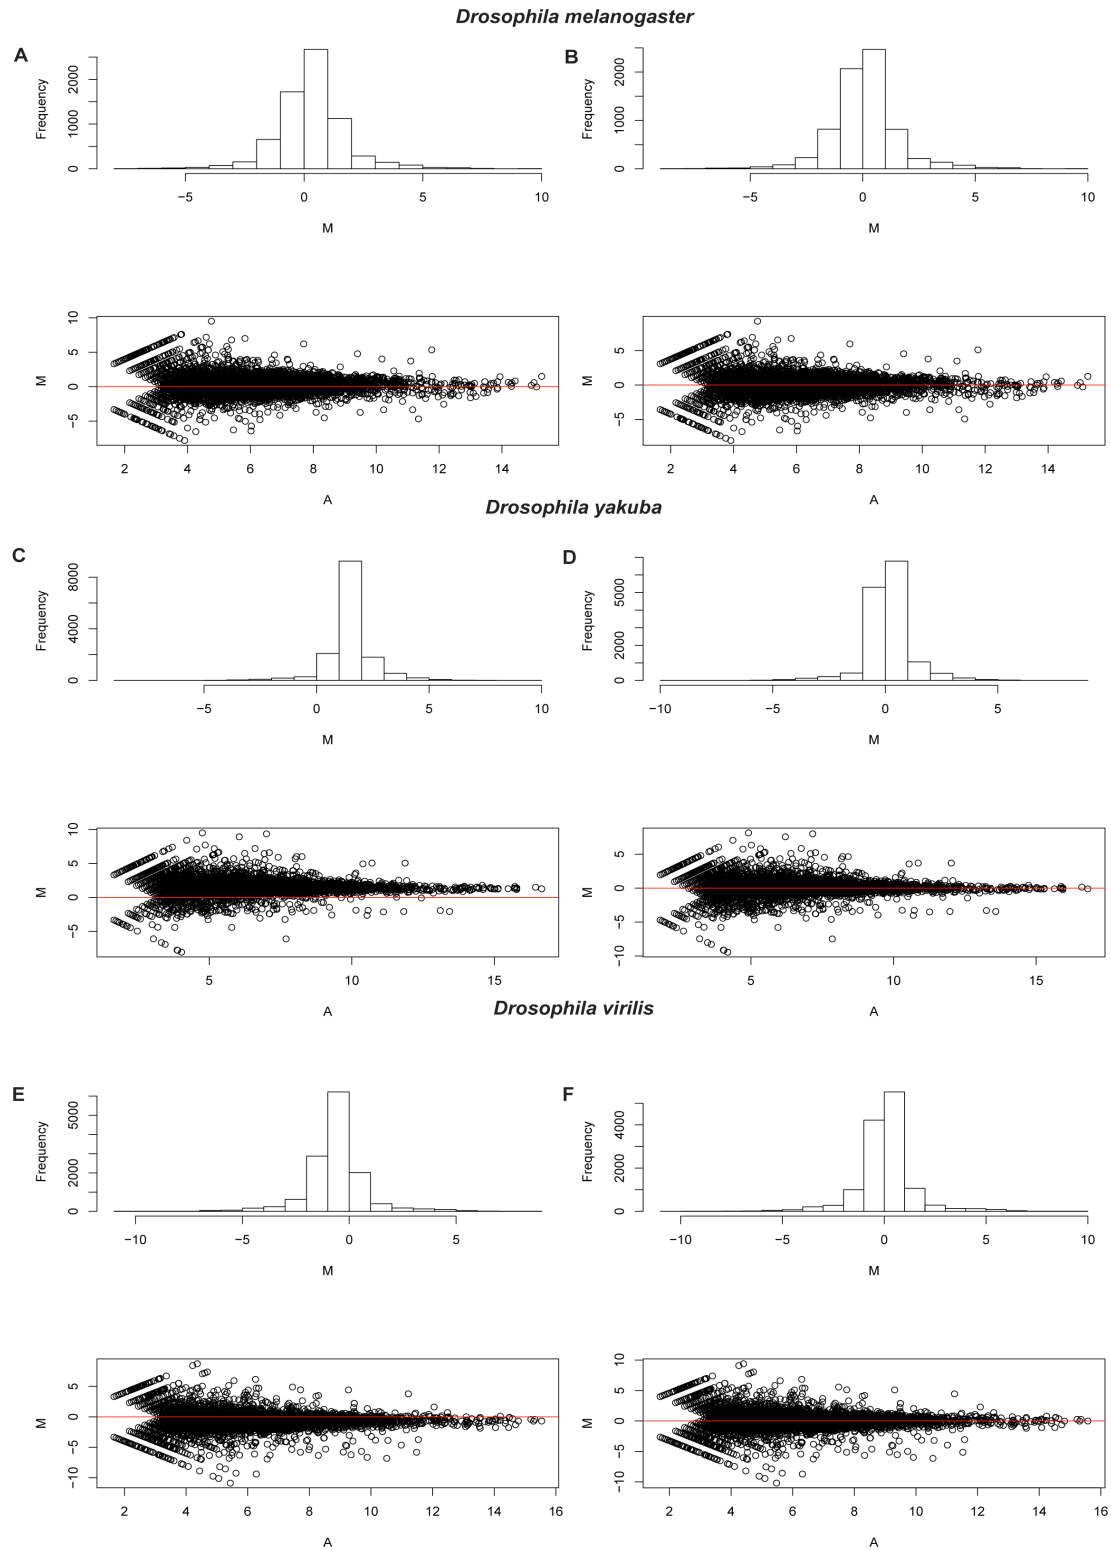

**Figure S4: Distribution of  $\log_2$  (eye-antennal / wing) ratios and MA plots before and after normalization.**

Histograms and MA plots before (A,C,E) and after (B,D,F) total-count normalization.

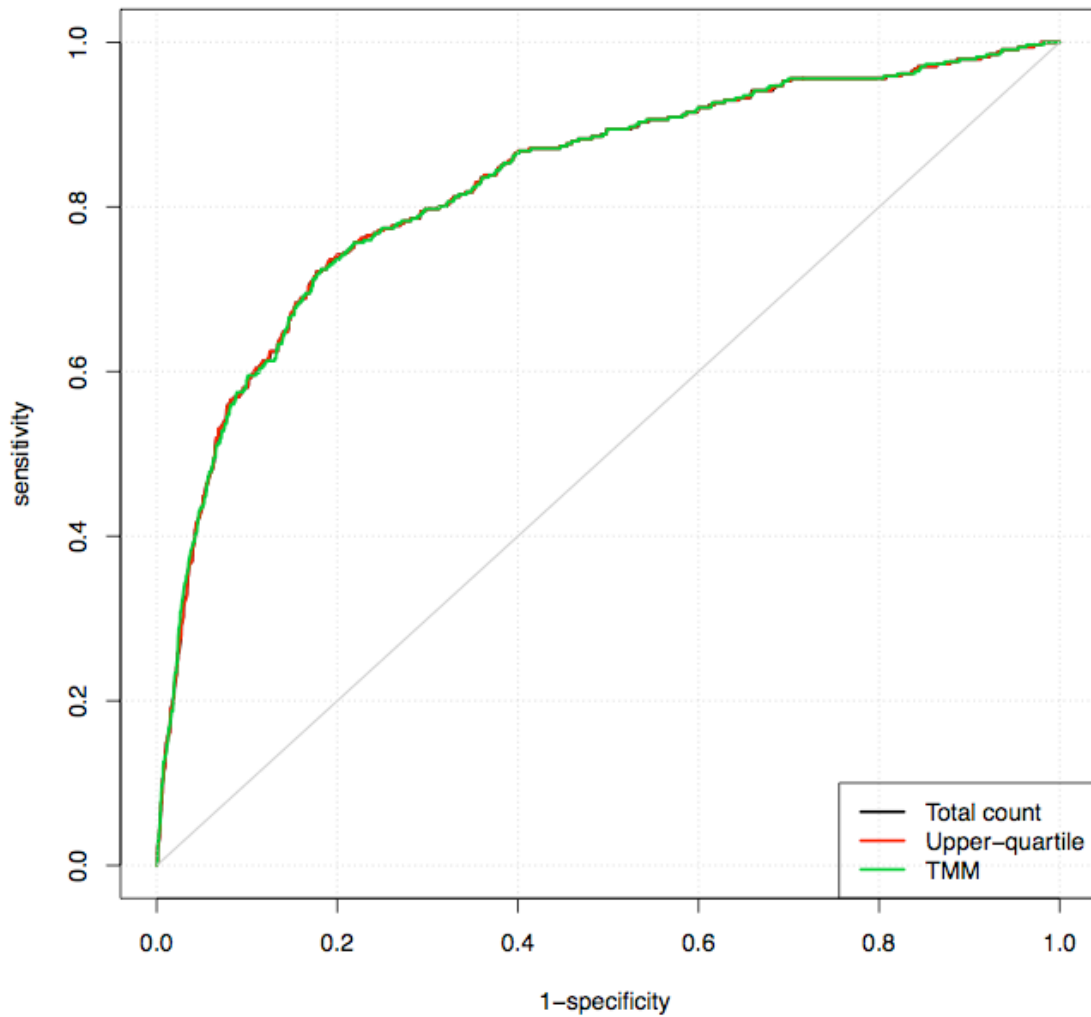

**Figure S5: Alternative methods for normalization of Tag-seq data**

Different methods were compared to normalize the Tag-seq read counts, namely total-count, upper-quartile (Bullard et al.), and trimmed mean of M-values (TMM) (Robinson and Oshlack 2010). The different methods yield similar results, which we believe is due to the fact that we also normalize within each species, by using the  $\log_2(\text{eye/wing})$ . The recovery curves are constructed in a similar way as in Figure S1, using the same set of true positives.

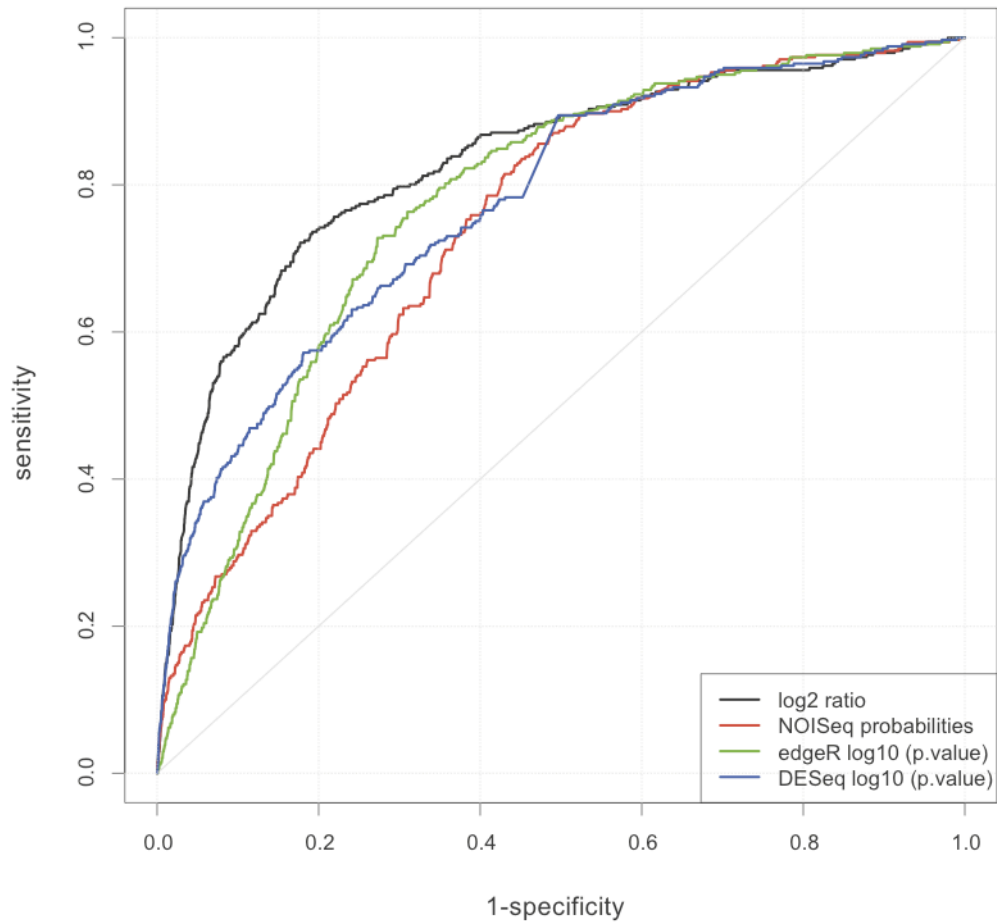

**Figure S6: Differential expression by Tag-seq in *D.melanogaster* only**

The x-axis represents all *D.melanogaster* genes ranked according to either of four measures: logratio in black, NOISeq probabilities in red, signed  $-\log_{10}(\text{p value})$  of edgeR in green, and signed  $-\log_{10}(\text{p value})$  of DESeq in blue. As true positives we used a set of 507 eye-enriched genes obtained from microarray data (Ostrin *et al.* 2006).

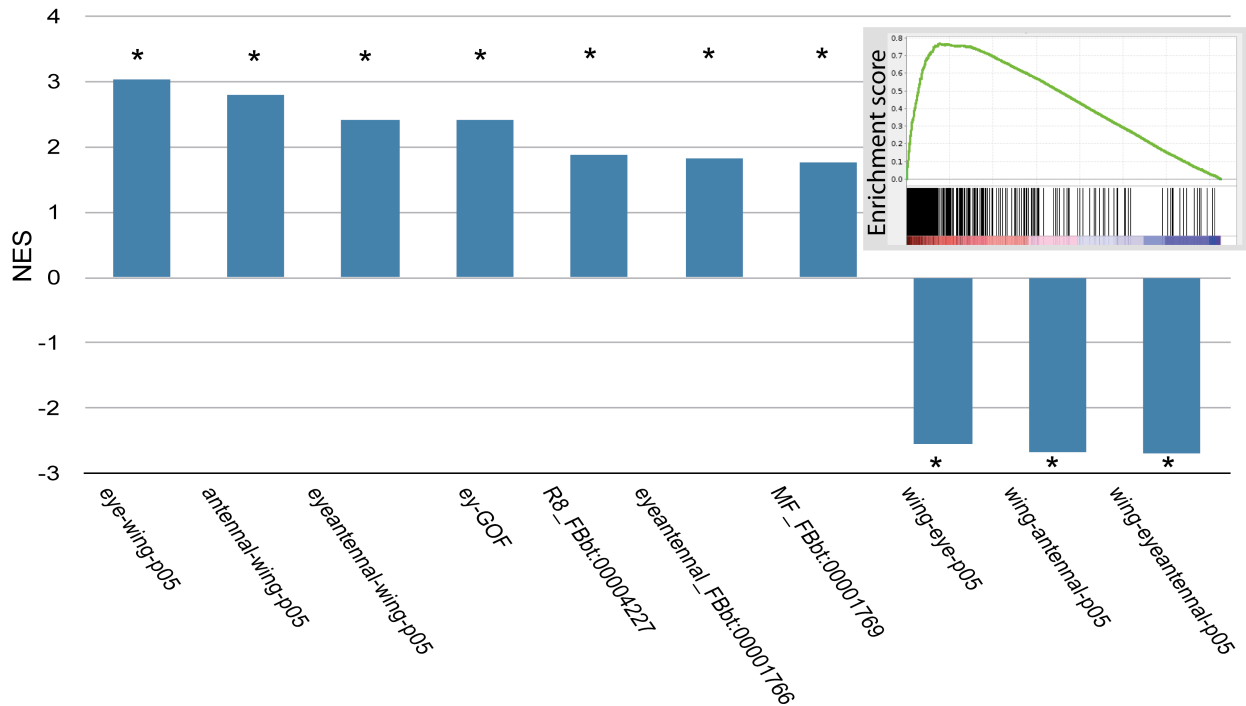

**Figure S7: GSEA results on eye-vs-wing comparison**

Normalized enrichment scores (NES) obtained by GSEA on the *D.melanogaster* log<sub>2</sub>(eye-antennal/wing) based ranking, using a selection of eye and wing related gene sets.

Eye-enriched gene sets: “eye-wing-p05”: set of 507 genes used in Figure S1; “antennal-wing-p05” and “eyeantennal-wing-p05” are derived from microarray data from (Aerts et al. 2010), containing 173 and 1383 genes respectively; “ey-GOF”: overexpressed genes when performing ey-GOF in imaginal discs (Ostrin et al. 2006), 178 genes ; FlyBase TermLink sets: FBbt:00004227 (34 genes), FBbt:00001766 (209 genes), FBbt:00001769 (72 genes). Wing-enriched gene sets: “wing-eye-p05”: 178 wing-specific genes from microarray data, compared to eye expression (Ostrin et al. 2006); “wing-antenna-p05” and “wing-eyeantennal-p05” : 125 and 182 wing specific genes (Aerts et al. 2010).

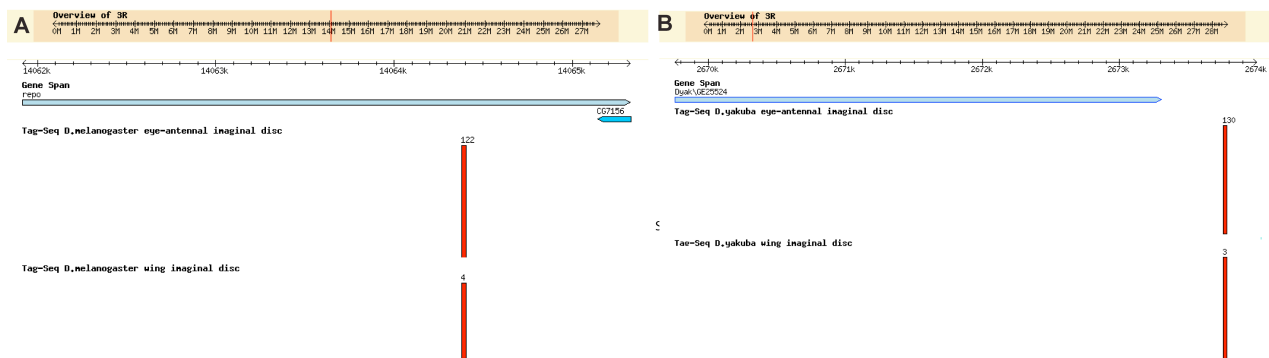

**Figure S8: An example where non-model organisms require annotation amendments.**

FlyBase Genome Browser Visualization of tags assigned to the *repo* gene in *D. melanogaster* (A) and *D. yakuba* (B), in eye-antennal and wing imaginal discs.

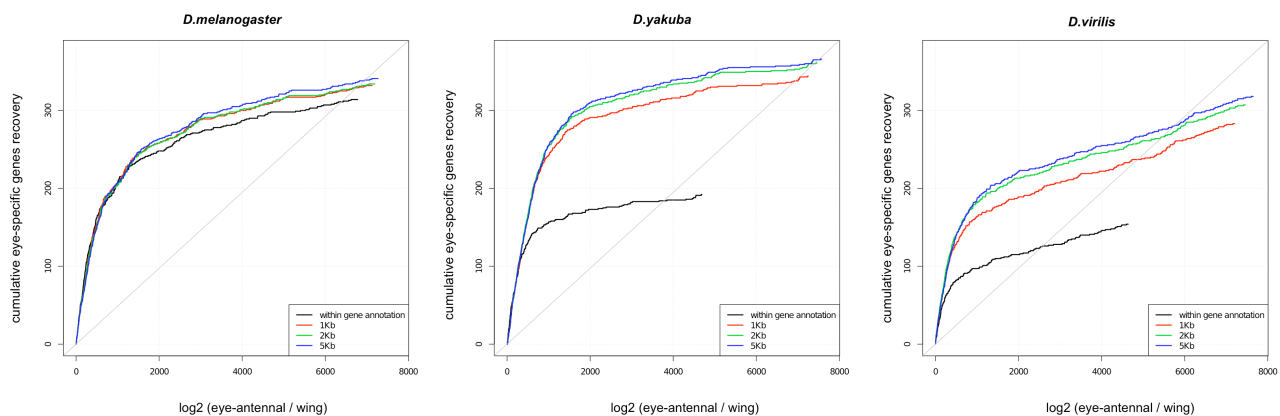

**Figure S9: Assignment of free Tag-seq peaks to genes.**

Comparison of 1kb, 2kb, and 5kb extensions of species-specific annotation to assign yet unassigned peaks to genes.

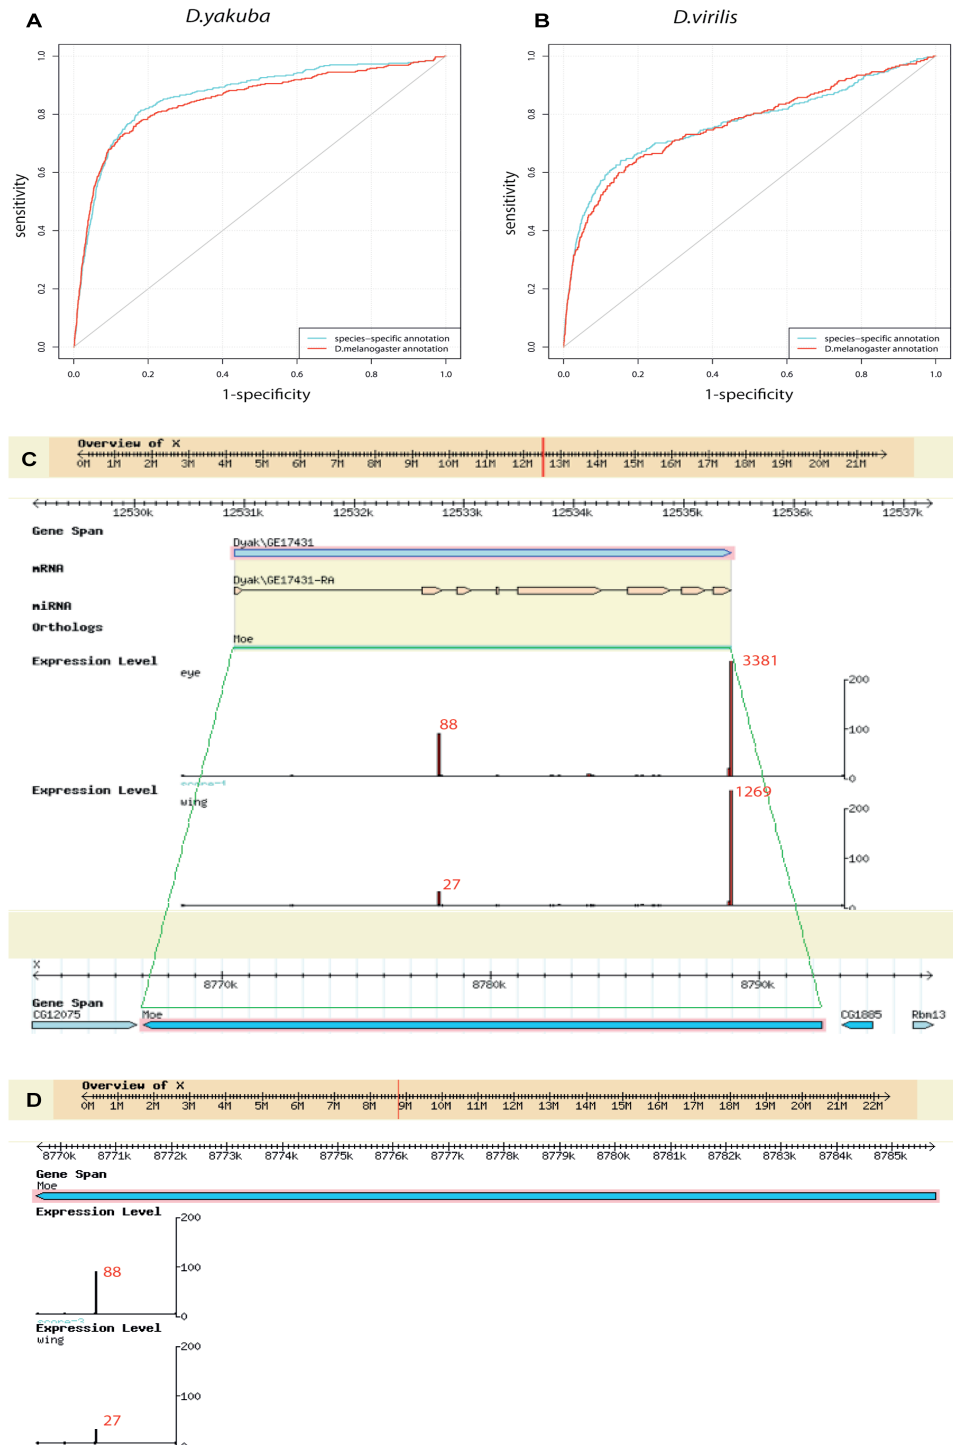

**Figure S10: Differences between 3' UTR extension and conversion to *D.melanogaster* coordinates.** (A-B) Comparison of annotation methods for non-model organisms: species-specific annotation with 3'UTR extension (green) and conversion to *D.melanogaster* coordinates (red) for *D.yakuba* (A), and *D.virilis* (B), by a similar recovery curve as in Figure S1. (C) Genome browser view of a gene involved in eye development, *Moe*, using the 3'UTR extension (C) and the conversion to *D.melanogaster* coordinates (D), yielding different peaks and different expression values in *D.yakuba*. In such cases we choose the logratio(eye/wing) that is most similar to the *D.melanogaster* ratio.

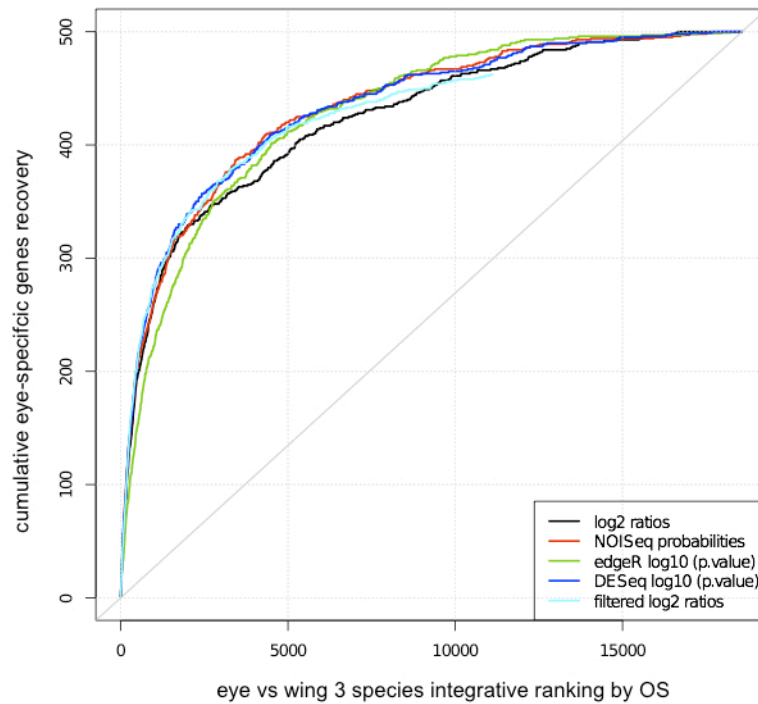

**Figure S11: Alternative methods for rank aggregation across species.**

Eye-enrichment gene rankings can be performed by multiple methods. The cumulative recovery curve is shown for 507 eye-specific genes (Ostrin et al. 2006) when performing the individual species differential expression analysis of eye-antennal versus wing by log2 ratio (eye-antennal / wing) (black), NOISeq (Tarazona et al. 2011) (red), edgeR (Robinson, McCarthy, and Smyth 2010) (green), DESeq (Anders and Huber 2010) (dark blue), and log2 (eye-antennal / wing) ratio after filtering low expressed genes (see Figure S1) (light blue). The situation described in the text corresponds to the light blue curve.



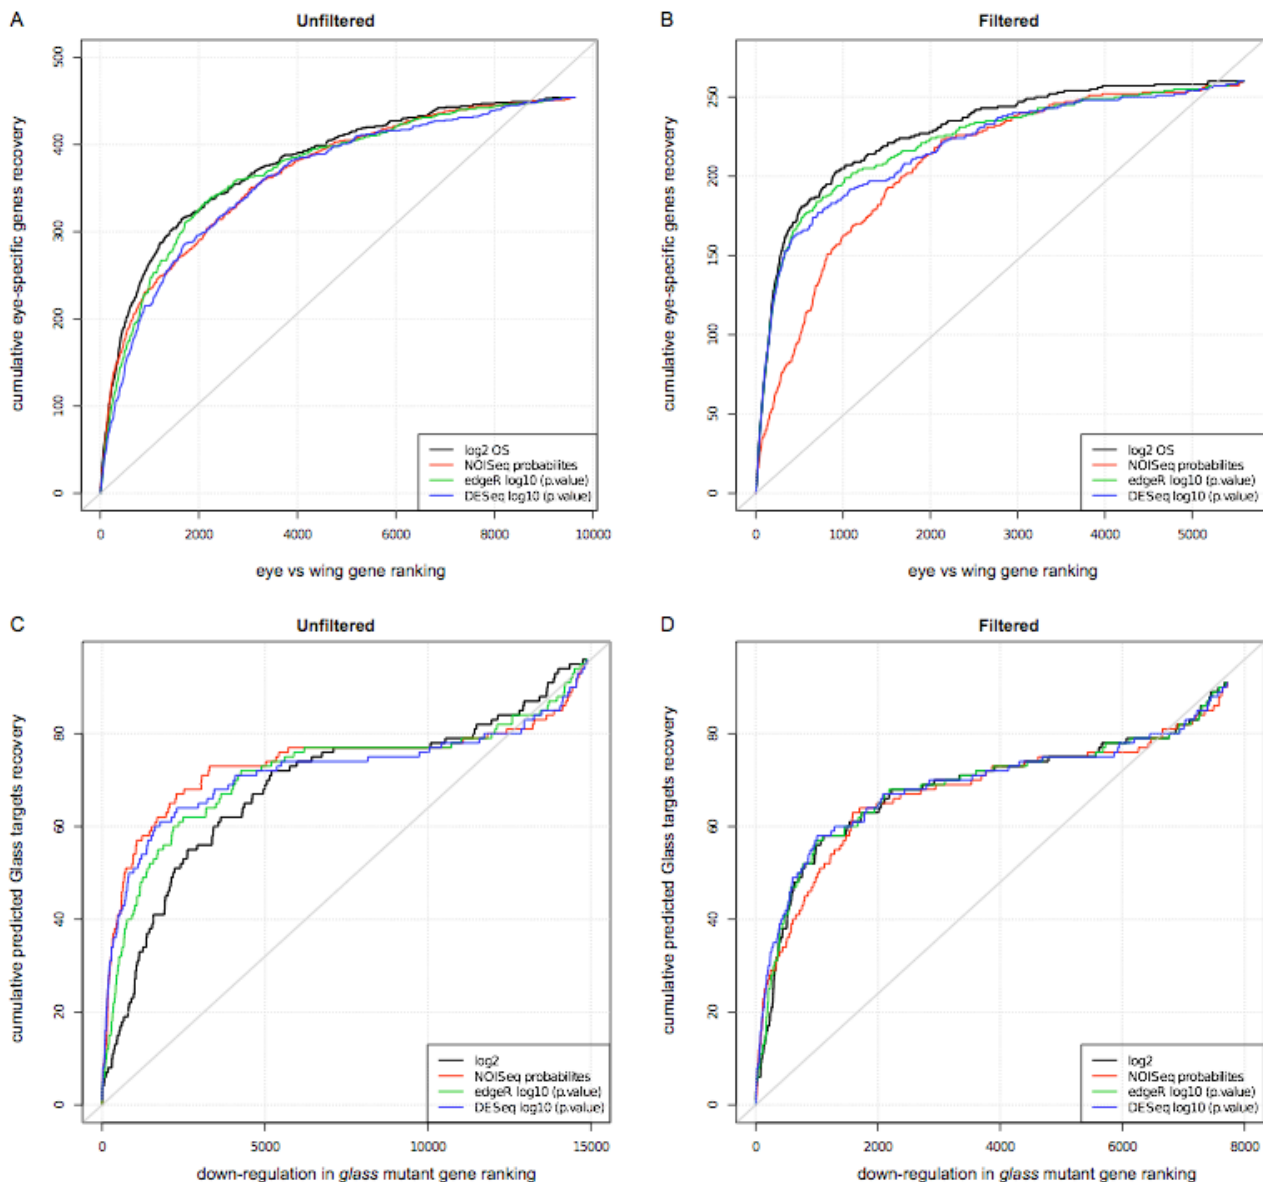

**Figure S12: Differential expression by Tag-seq across species and by 'classical' RNA-seq in *D. melanogaster***

Differential expression methods applied are rank integration by Order Statistics (OS) (Aerts et al. 2006) (black), NOISeq (Tarazona et al. 2011) (red), edgeR (Robinson, McCarthy, and Smyth 2010) (green) and DESeq (Anders and Huber 2010) (blue). These methods are applied to cross-species Tag-seq data (A-B) and to classical differential expression in a single species, between two conditions, using replicates (C-D). True positives used for A-B are 507 eye-specific genes (Ostrin *et al.* 2006); while true positives used for C-D are 96 predicted Glass targets. A) Unfiltered data, 9633 genes presenting expression in all three species considered in this study. B) Filtered data on number of counts (see Figure S1) and with expression in all three species, 5691 genes. C) Unfiltered RNA-seq data. D) Filtered data RNA-seq data using a threshold of 5 RPKM in at least

two of the four samples. This figure shows that the order statistics (on the logratio ranking) outperforms classical methods on cross-species data. On RNA-seq data sets, the logratio is valid when data are filtered, otherwise the statistical methods are more robust.

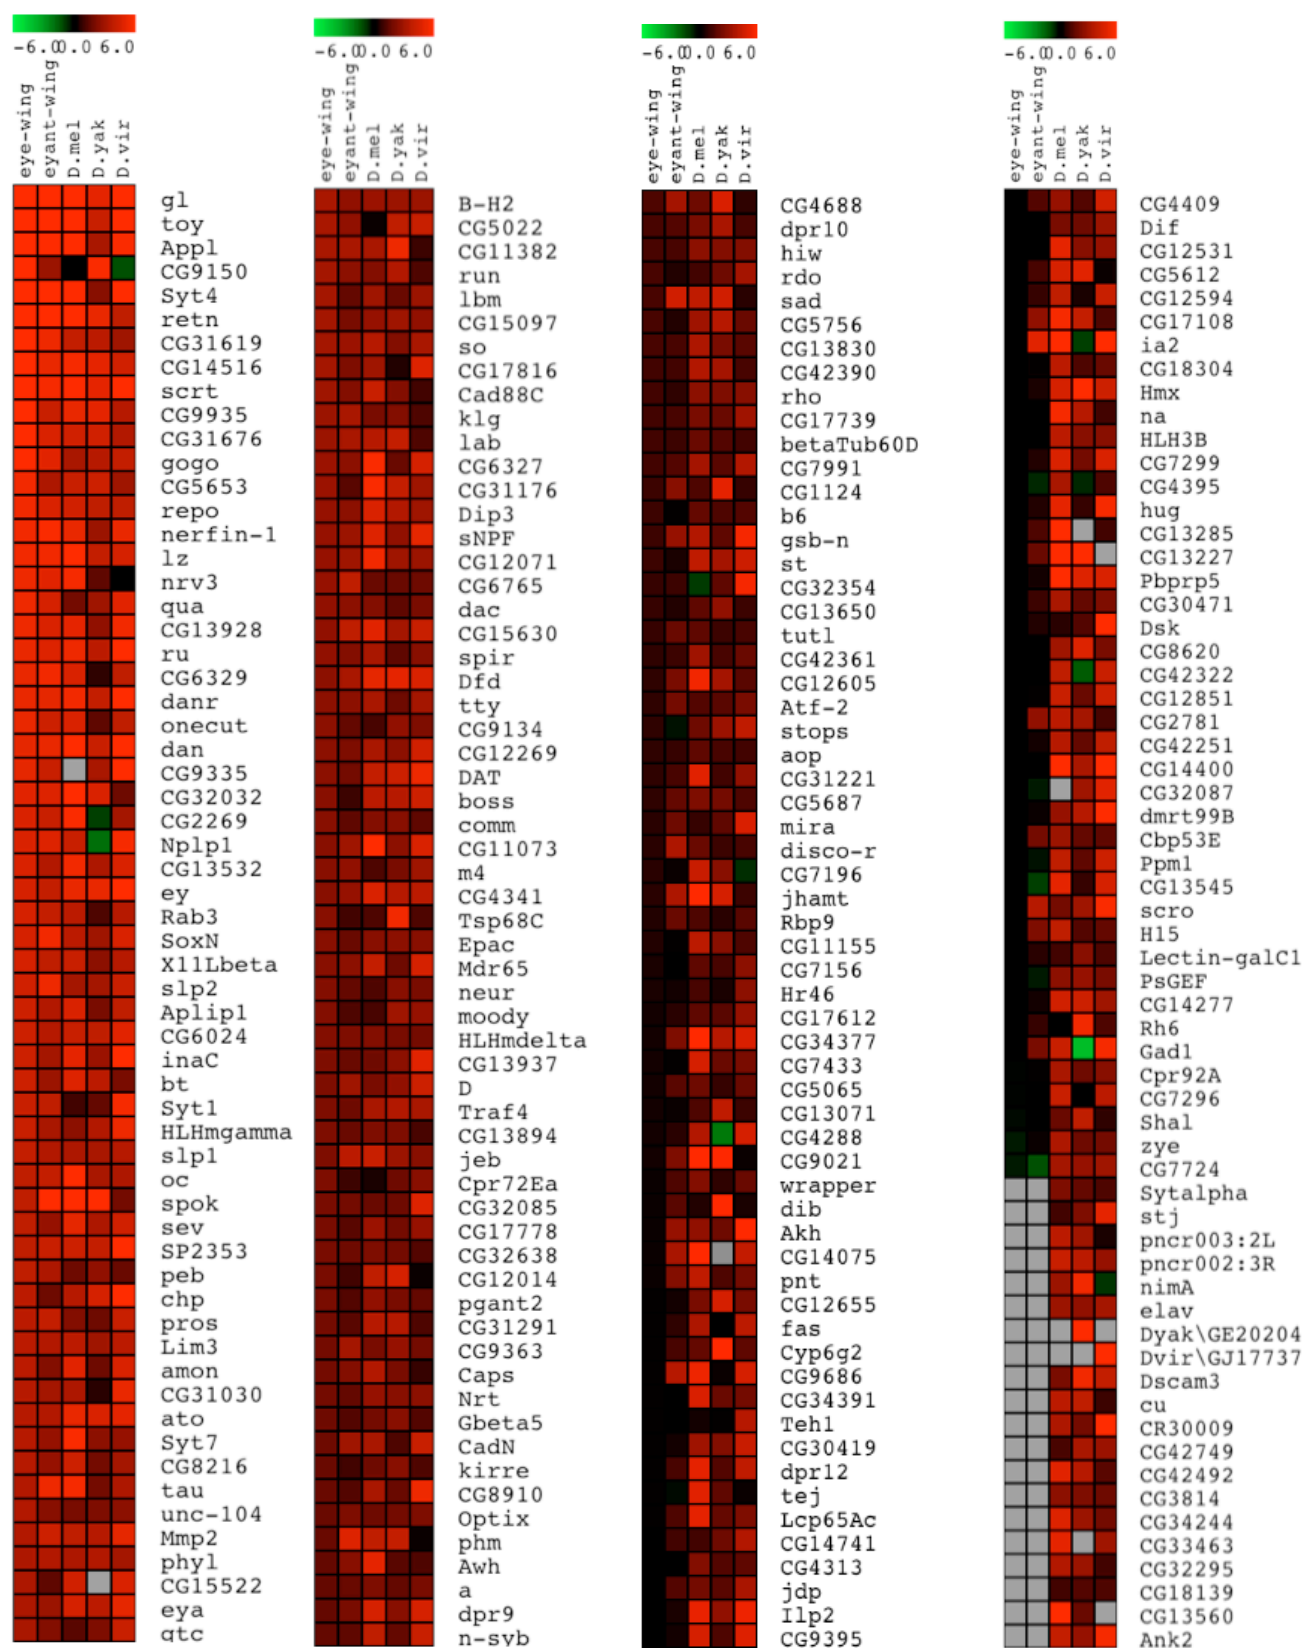

**Figure S13:  $\log_2$  (eye-antennal / wing) ratio for the top 245 genes in the cross-species order statistics ranking.**

First two columns correspond to microarray data from (Ostrin et al. 2006), third to sixth column represent *D.melanogater*, *D.yakuba*, *D.virilis*  $\log_2$  (eye-antennal / wing) measures by Tag-seq from this analysis.

|                               | Glass                                                                             |          |                        | SCRT                                                                              |              | SU(H)                                                                             |             | SOXN                                                                               |             | EY                                                                                  |             |
|-------------------------------|-----------------------------------------------------------------------------------|----------|------------------------|-----------------------------------------------------------------------------------|--------------|-----------------------------------------------------------------------------------|-------------|------------------------------------------------------------------------------------|-------------|-------------------------------------------------------------------------------------|-------------|
|                               | 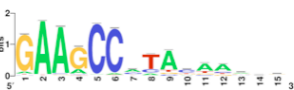 |          |                        |  |              |  |             |  |             |  |             |
|                               | flyfactorsurvey-gl_SOLEXA_5_FBgn0004618                                           |          |                        | flyfactorsurvey-scr_t_2.5_FBgn0004880                                             |              | jaspar4-MA0085.1-Su_H                                                             |             | transfac10.1-M00410-V-SOX9_B1                                                      |             | transfac10.1-M00097-V-PAX6_01                                                       |             |
| Top genes individual rankings | Motif rank                                                                        | NES      | Number of Target Genes | Motif rank                                                                        | NES          | Motif rank                                                                        | NES         | Motif rank                                                                         | NES         | Motif rank                                                                          | NES         |
| <i>D.melanogaster</i> (100)   | 29                                                                                | 2.507075 | 13                     | 2421                                                                              | -0.375550856 | 2236                                                                              | -0.24903562 | 707                                                                                | 0.862376692 | 193                                                                                 | 1.645489979 |
| <i>D.yakuba</i> (500)         | 1                                                                                 | 3.678888 | 64                     | 3424                                                                              | -1.345472222 | 1476                                                                              | 0.324799668 | 161                                                                                | 1.669020829 | 146                                                                                 | 1.715076437 |
| <i>D.virilis</i> (200)        | 1                                                                                 | 3.678859 | 36                     | 933                                                                               | 0.6514162658 | 3253                                                                              | -1.1136774  | 805                                                                                | 0.769967333 | 76                                                                                  | 2.102569143 |

**Figure S14: Motif discovery by cisTargetX when using the top eye-enriched genes from individual species.** Gene set thresholds giving best enrichment score in cisTargetX (Aerts et al. 2010) for flyfactorsurvey-gl\_SOLEXA-5\_FBgn0004618 motif (Zhu et al. 2011). Motif rank, enrichment scores and number of target genes for glass motif and motif rank and enrichment scores for motifs corresponding to SCRT, SU(H), SOXN and EY for which high enrichment is found when considering three species as replicates.

| TF    | LOGO                                                                              |                                         | DESeq      |        | edgeR      |        | NOISeq     |         | OS         |          |
|-------|-----------------------------------------------------------------------------------|-----------------------------------------|------------|--------|------------|--------|------------|---------|------------|----------|
|       |                                                                                   |                                         | 250 genes  |        | 250 genes  |        | 250 genes  |         | 245 genes  |          |
|       |                                                                                   |                                         | Motif rank | NES    | Motif rank | NES    | Motif rank | NES     | Motif rank | NES      |
| GL    | 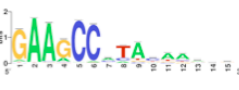 | flyfactorsurvey-gl_SOLEXA_5_FBgn0004618 | 1          | 5.3455 | 2          | 4.4723 | 1          | 4.8317  | 1          | 4.7523   |
| SCRT  |  | flyfactorsurvey-scrf_2_5_FBgn0004880    | 16         | 3.0195 | 23         | 2.8229 | -          | -       | 3          | 3.506898 |
| SU(H) |  | jaspar4-MA0085.1-Su_H                   | 6          | 3.7133 | 1          | 4.681  | 8          | 3.47088 | 15         | 3.104033 |
| GRH   |  | transfac10.1-M00951-I-GRH_01            | 41         | 2.666  | -          | -      | 2          | 4.09867 | -          | -        |

**Figure S15 cisTargetX results on various sets of conserved eye-specific genes.** DESeq, edgeR, NOISeq are applied using species as replicates (3 eyes vs 3 wings). The top 250 most differentially expressed genes are used as input for cisTargetX. Note that this number cannot be derived by GORilla, but is used to compare sets with similar sizes. The sizes defined by GORilla on the edgeR and NOISeq results do not perform well on cisTargetX, which argues for using OS. The cisTargetX results regarding the glass motif are not very different between these sets, the glass motif is always found to be highly enriched, on conserved eye-specific gene sets, regardless of the method used to integrate the data across species. Even though at Gene Ontology level there are differences between the methods (see main text, Table 1), these differences are not reflected at the motif level, most likely because a minimum number of Glass targets is always present, leading to the robust identification of the motif by cisTargetX.

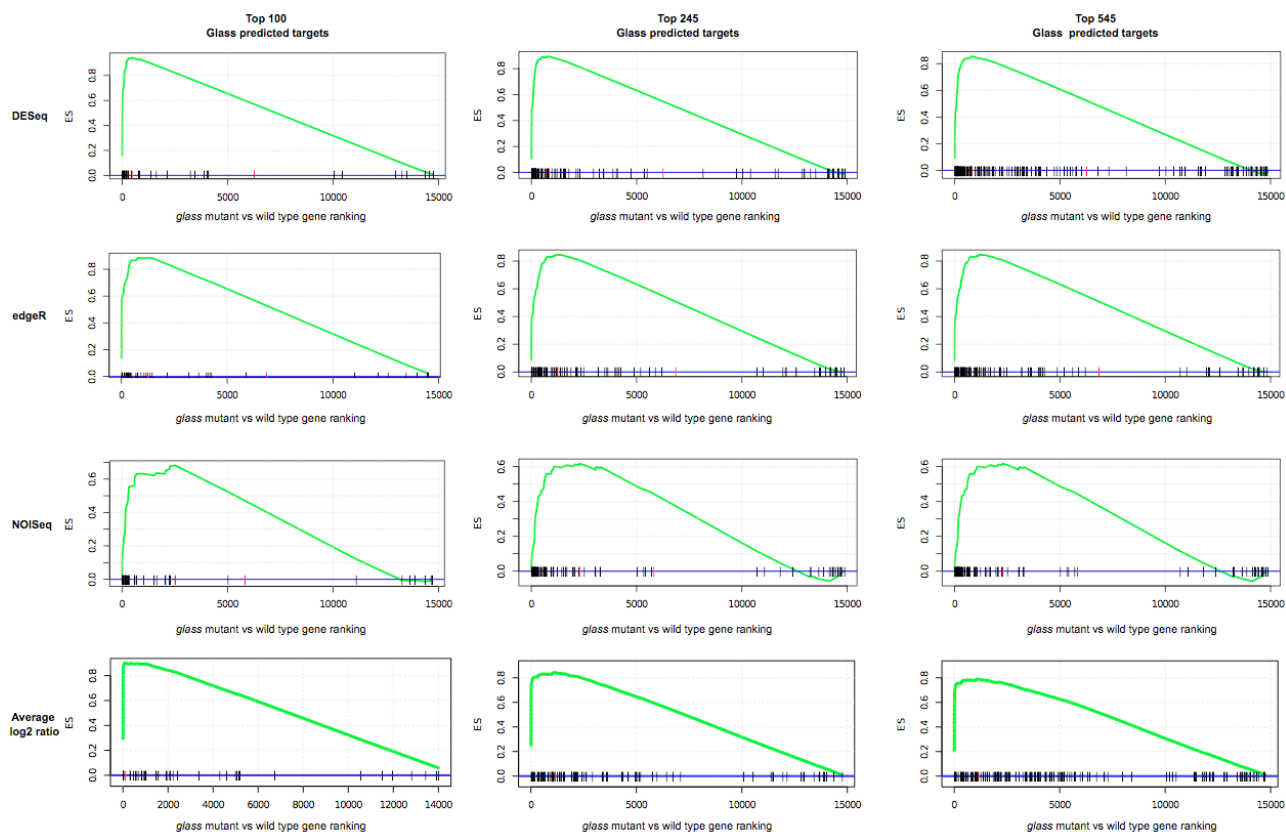

**Figure S16: Gene Set Enrichment Analyses of predicted Glass targets in RNA-seq data**

GSEA plots showing the significant enrichment of predicted Glass targets obtained from different sizes of input gene sets to cisTargetX (top 100, tops 245 and top 545 eye-enriched genes; in columns), using different differential expression methods for RNA-seq data on the x-axis (in the rows). All methods agree in finding an enrichment for down-regulation on the predicted Glass targets.

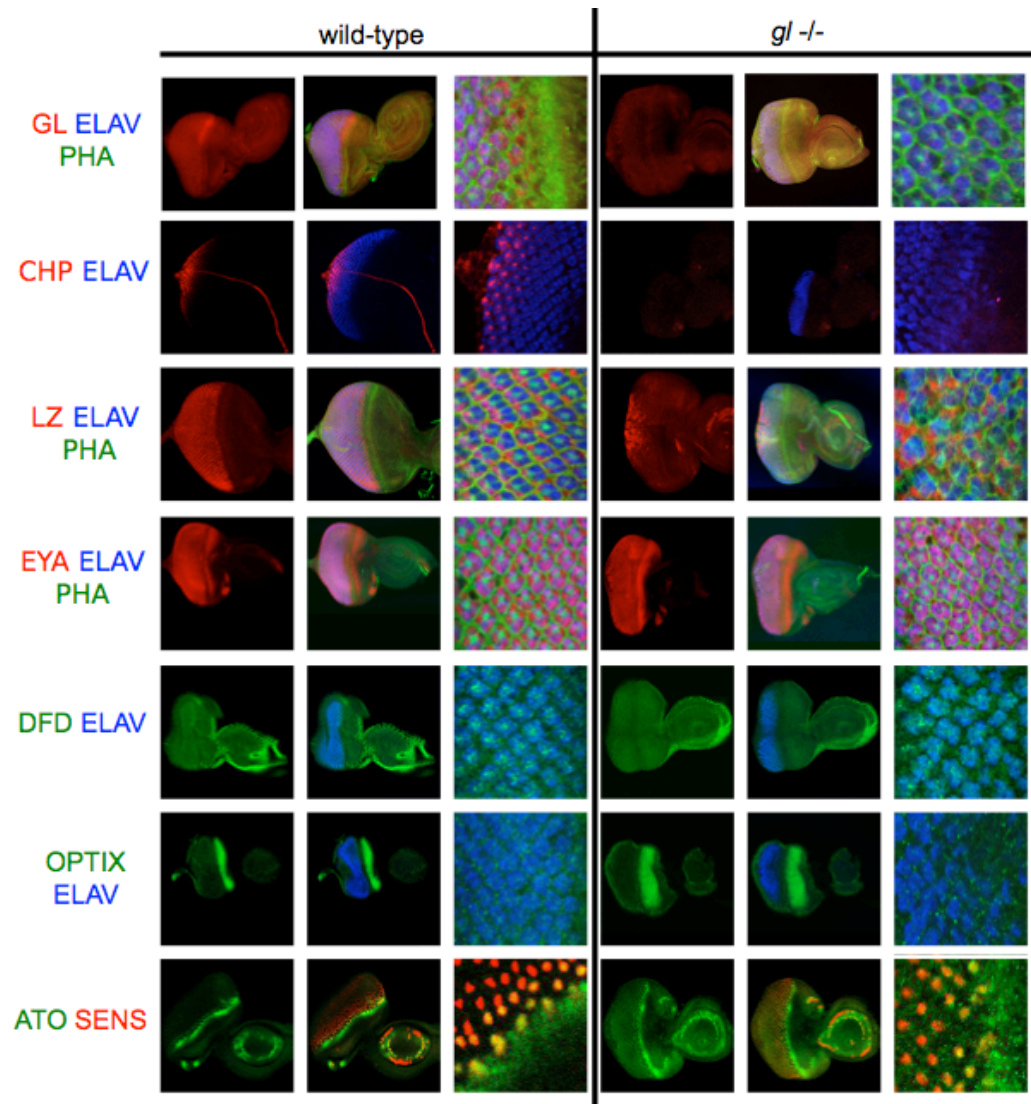

**Figure S17: Antibody stainings for a set of predicted Glass targets in wild-type and *gl*<sup>-/-</sup> eye imaginal discs.** Expression of validated targets (*gl*, *chp*, *lz*) is clearly affected in the *glass* mutant. Expression of invalidated targets (*eya*, *Dfd*, *Optix*, and *ato*) is unaffected in the *glass* mutant.





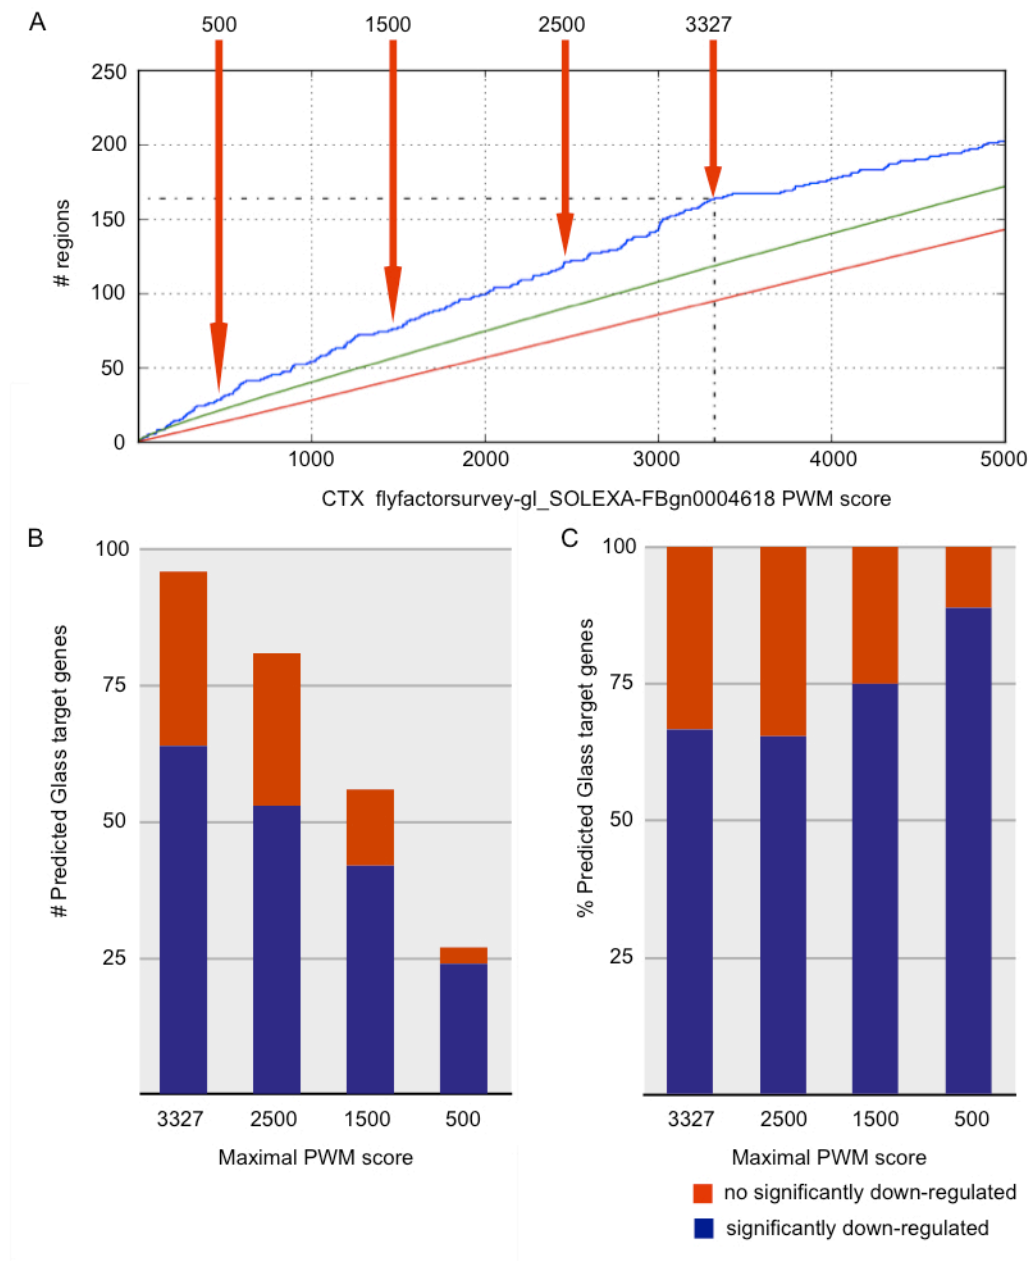

**Figure S19: Relation between the cisTargetX genomic ranking and false positive rates.**

A) cisTargetX result showing the recovery of the input set (245 conserved eye-specific genes) along the genomic ranking generated by a cross-species ClusterBuster scoring with the Glass PWM. This recovery curve is found with the highest, and most significant, Area Under the Curve (AUC) among all tested PWMs. The automatically defined threshold is at a genomic rank of 3327, determined as the point with the largest difference between the observed (blue) curve and the average curve plus 2 standard deviations (green curve). This is the situation used in the text, and yields 62 distinct predicted Glass targets. We then lowered this cut-off to select smaller sets of high-scoring genes. The more we move this threshold to the left, selecting only better ranked genes, the better the true positive rate (more significantly down-regulated genes in the RNA-seq data).

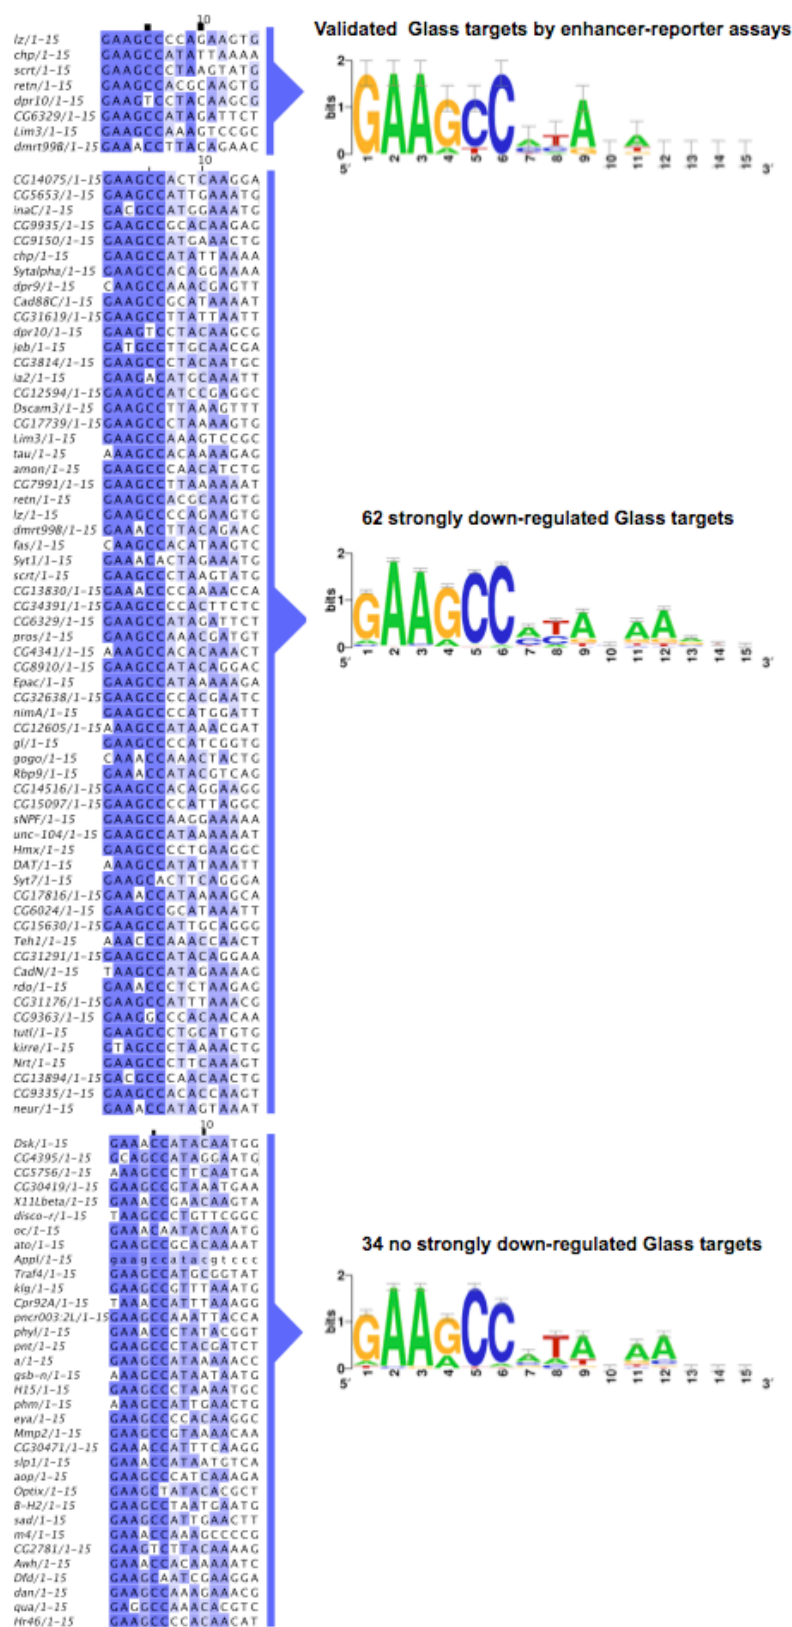

**Figure S20: Individual Glass binding sites**

Comparison of the maximum scoring Glass binding site, within the maximum scoring CRM, between validated Glass targets by enhancer-reporter assays, 62 predicted Glass targets significantly down-regulated in *gl*<sup>-/-</sup> and 34 invalidated Glass targets.

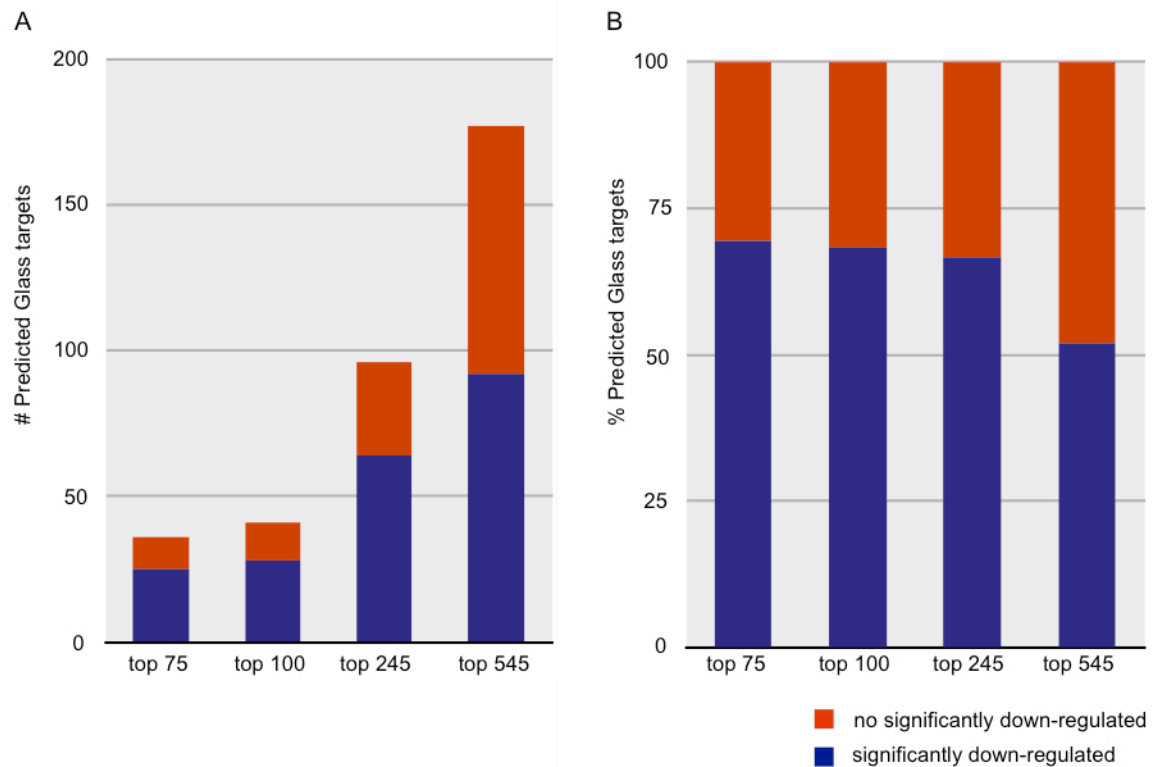

**Figure S21: Relation between different sizes of input sets and the rate of false positive Glass target predictions.**

Graphs presenting the absolute number (A) and the percentage (B) of significantly (blue) versus non-significantly (red) down-regulated Glass targets. Each bar represents a different gene set that was used as input for cisTargetX, using different thresholds (75, 100, 245, and 545) on the OS-based eye-vs-wing gene ranking across species. The percentage of predicted Glass targets that are significantly down-regulated in the *glass* mutant remains nearly constant while the input set increases in size from 75 to 245 genes. Only when using 545 genes, there is an increase in the number of false positive predictions (genes that are not significantly down-regulated).



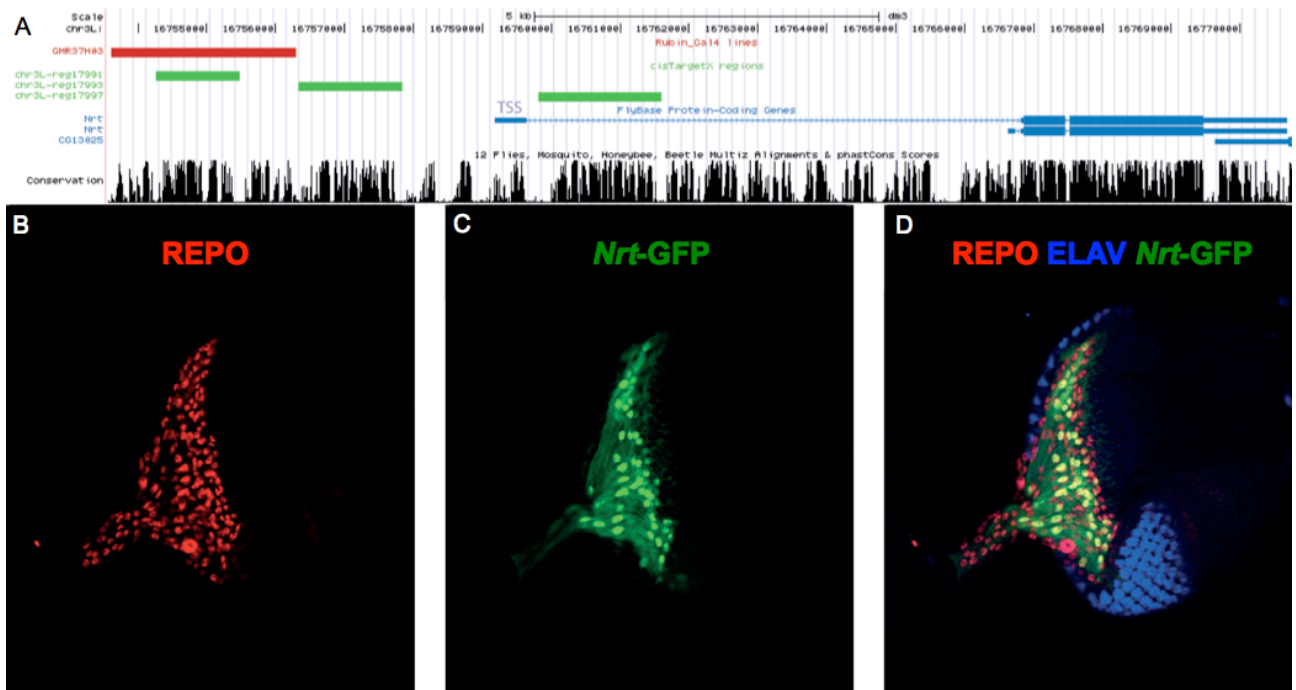

**Figure S23: *Nrt* tested enhancer drives expression in glia.** A) Visualization by UCSC genome browser of the *Nrt* gene (blue) with predicted cisTargetX glass-binding sites regions (green) and enhancer-GAL4 line (Pfeiffer et al. 2008) spanning a predicted CRM. A-C) Immunostaining of an eye-antennal imaginal disc in third instar larvae with enhancer-GAL4 x UAS-GFP. Antibodies are Anti-repo (red) , anti-elav (blue) and anti-GFP (green).

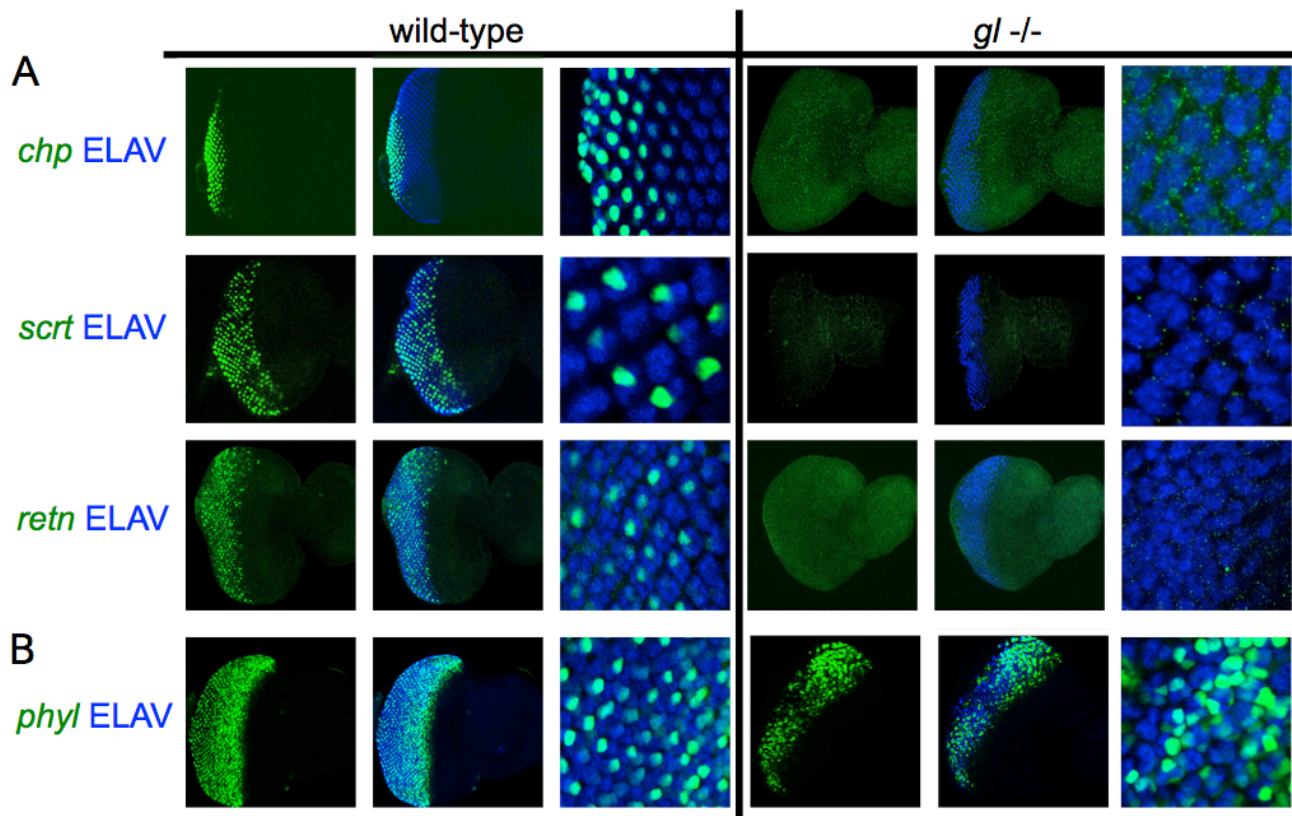

**Figure S24: Enhancer-GFP in wt and *gl*<sup>-/-</sup>.**

A) Enhancer-GFP for *chp*, *scrt* and *retn*, genes strongly down-regulated in *gl*<sup>-/-</sup>. The enhancer-reporter activity is gone or severely affected in the *glass* mutant. B) Same experiment for the enhancer-GFP reporter construct of the *phyl* CRM. This is the CRM targeted by Atonal, as previously reported in (Aerts *et al.* 2010).

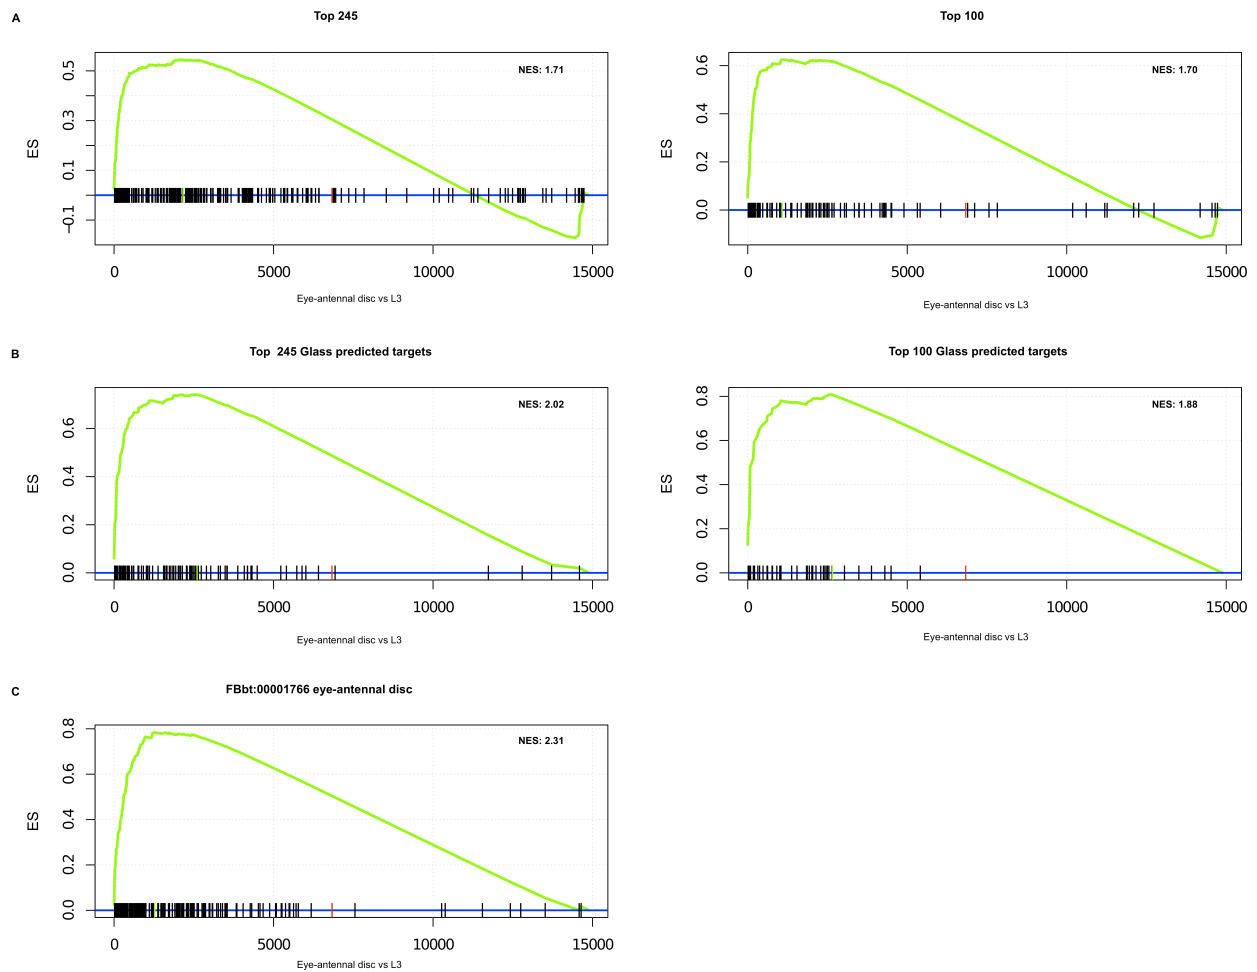

**Figure S25: Gene Set Enrichment Analyses (GSEA) using L3 larvae RNA-seq data.**

A) Top 245 and top 100 eye-enriched genes using Tag-seq cross-species. B) Predicted Glass targets from the top 245 and top 100 eye-enriched genes by cisTargetX, showing that Glass target gene predictions cause a selection for genes enriched in eye-antennal disc compared to total larval RNA. C) 220 genes expressed in "eye-antennal disc", as annotated by the FlyBase Term FBbt:00001766, showing that such genes may still be enriched in total larvae RNA compared to the eye-antennal disc.



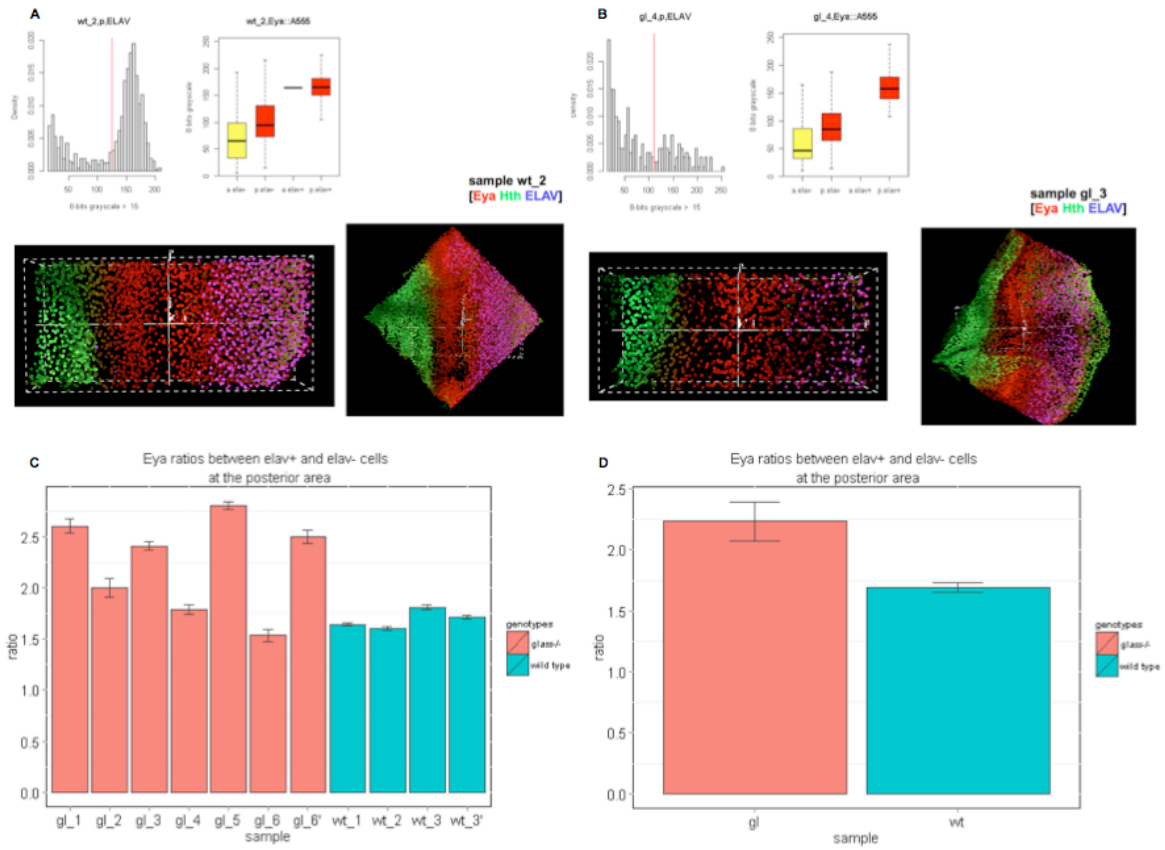

**Figure S26: EYA quantification in wild-type and glass mutant eye discs.**

A) Example of one wild type eye disc showing the raw Eya quantification data in ELAV- and ELAV+ cells. B) Example of one glass mutant disc showing raw EYA quantification in ELAV- and ELAV+ cells. C) Normalized ratios (ELAV+ over ELAV-) of EYA expression comparing multiple wild type (blue) and *glass* mutant discs (red). D) Average of the ratios shown in C). Details on the quantification steps are provided in the Materials and Methods Section.



**Table S1: Mapping results**

| Species                        | Tissue       | Number of outputted reads | Genome Assembly | % mapped reads | Annotation                                  | % Reads falling within annotation out of total | % Tags falling within annotation out of mapped tags |
|--------------------------------|--------------|---------------------------|-----------------|----------------|---------------------------------------------|------------------------------------------------|-----------------------------------------------------|
| <i>Drosophila melanogaster</i> | eye-antennal | 4667043                   | FlyBase 5       | 47,30          | FlyBase 5.30                                | 41,30                                          | 87,32                                               |
|                                | wing         | 2447992                   | FlyBase 5       | 76,00          | FlyBase 5.30                                | 69,39                                          | 91,31                                               |
| <i>Drosophila yakuba</i>       | eye-antennal | 6844469                   | FlyBase 1       | 82,89          | FlyBase 1.3                                 | 34,38                                          | 41,48                                               |
|                                |              |                           | UCSC droYak2    | 83,61          | <i>Drosophila melanogaster</i> FlyBase 5.30 | 70,54                                          | 84,37                                               |
|                                | wing         | 2719615                   | FlyBase 1       | 80,92          | FlyBase 1.3                                 | 34,15                                          | 42,21                                               |
|                                |              |                           | UCSC droYak2    | 82,08          | <i>Drosophila melanogaster</i> FlyBase 5.30 | 69,41                                          | 84,56                                               |
| <i>Drosophila virilis</i>      | eye-antennal | 4676180                   | FlyBase 1       | 44,18          | FlyBase 1.2                                 | 22,18                                          | 50,20                                               |
|                                |              |                           | UCSC droVir3    | 44,18          | <i>Drosophila melanogaster</i> FlyBase 5.30 | 27,59                                          | 62,44                                               |
|                                | wing         | 4173261                   | FlyBase 1       | 75,06          | FlyBase 1.2                                 | 41,88                                          | 55,79                                               |
|                                |              |                           | UCSC droVir3    | 75,06          | <i>Drosophila melanogaster</i> FlyBase 5.30 | 50,59                                          | 67,39                                               |

**Table S2:** Gene Ontology Enrichment Analysis for individual species *D.melanogaster*, *D.yakuba*, *D.virilis* log2 (eye-antennal) rankings, and considering species as replicates. For edgeR (Robinson, McCarthy, and Smyth 2010) and DESeq (Anders and Huber 2010) genes are ranked according to their differential expression between eye-antennal and wing imaginal discs using the signed  $-\log_{10}(\text{p.value})$ , for one-to-one orthologs. For NOISeq (Tarazona et al. 2011) is the ranking is based on the probability of differential expression. The cross-species ranking is based on the order statistics integration of the three independent logratio rankings of the three species (Aerts et al. 2006).

**Independent file : TS2.xls**

**Table S3: Gene counts for eye-antennal and wing imaginal discs in *D.melanogaster*, *D.yakuba* and *D.virilis*.** Raw counts, normalized counts and logratio (eye-antennal / wing). For *D.yakuba* and *D.virilis* the corresponding *D.melanogaster* FBgn identifiers are added, as well as the methodology used, being either mapping by orthology using GeneTrees (Vilella et al. 2009) or mapping by whole-genome alignment using the UCSC genome browser (Fujita et al. 2010). Expression values are those after low-count filtering. Raw count data with genomic positions can be obtained from GEO (accession number GSE39784).

**Independent file : TS3.xls**



**Table S4: Predicted Transcription Factor – Target Gene regulatory interactions extracted from cisTargetX outputs from the top 100 and 245 genes in cross-species order statistics ranking.**

|           |                |           |                   |             |                   |
|-----------|----------------|-----------|-------------------|-------------|-------------------|
| <i>ey</i> | <i>Appl</i>    | <i>gl</i> | <i>CG5653</i>     | <i>gl</i>   | <i>pros</i>       |
| <i>ey</i> | <i>CG31176</i> | <i>gl</i> | <i>CG5756</i>     | <i>gl</i>   | <i>qua</i>        |
| <i>ey</i> | <i>CG31221</i> | <i>gl</i> | <i>CG6024</i>     | <i>gl</i>   | <i>Rbp9</i>       |
| <i>ey</i> | <i>CG6024</i>  | <i>gl</i> | <i>CG6329</i>     | <i>gl</i>   | <i>rdo</i>        |
| <i>ey</i> | <i>CG6327</i>  | <i>gl</i> | <i>CG7991</i>     | <i>gl</i>   | <i>retn</i>       |
| <i>ey</i> | <i>CG7991</i>  | <i>gl</i> | <i>CG8910</i>     | <i>gl</i>   | <i>sad</i>        |
| <i>ey</i> | <i>dan</i>     | <i>gl</i> | <i>CG9150</i>     | <i>gl</i>   | <i>scrt</i>       |
| <i>ey</i> | <i>DAT</i>     | <i>gl</i> | <i>CG9335</i>     | <i>gl</i>   | <i>slp1</i>       |
| <i>ey</i> | <i>dmrt99B</i> | <i>gl</i> | <i>CG9363</i>     | <i>gl</i>   | <i>sNPF</i>       |
| <i>ey</i> | <i>dpr12</i>   | <i>gl</i> | <i>CG9935</i>     | <i>gl</i>   | <i>Syt1</i>       |
| <i>ey</i> | <i>dpr9</i>    | <i>gl</i> | <i>chp</i>        | <i>gl</i>   | <i>Syt7</i>       |
| <i>ey</i> | <i>gsb-n</i>   | <i>gl</i> | <i>Cpr92A</i>     | <i>gl</i>   | <i>Sytalpha</i>   |
| <i>ey</i> | <i>Lim3</i>    | <i>gl</i> | <i>dan</i>        | <i>gl</i>   | <i>tau</i>        |
| <i>ey</i> | <i>oc</i>      | <i>gl</i> | <i>DAT</i>        | <i>gl</i>   | <i>Teh1</i>       |
| <i>ey</i> | <i>ru</i>      | <i>gl</i> | <i>Dfd</i>        | <i>gl</i>   | <i>Traf4</i>      |
| <i>ey</i> | <i>slp1</i>    | <i>gl</i> | <i>disco-r</i>    | <i>gl</i>   | <i>tutl</i>       |
| <i>ey</i> | <i>sNPF</i>    | <i>gl</i> | <i>dmrt99B</i>    | <i>gl</i>   | <i>unc-104</i>    |
| <i>ey</i> | <i>Traf4</i>   | <i>gl</i> | <i>dpr10</i>      | <i>gl</i>   | <i>X11Lbeta</i>   |
| <i>gl</i> | <i>a</i>       | <i>gl</i> | <i>dpr9</i>       | <i>scrt</i> | <i>a</i>          |
| <i>gl</i> | <i>amon</i>    | <i>gl</i> | <i>Dscam3</i>     | <i>scrt</i> | <i>amon</i>       |
| <i>gl</i> | <i>aop</i>     | <i>gl</i> | <i>Dsk</i>        | <i>scrt</i> | <i>Ank2</i>       |
| <i>gl</i> | <i>Appl</i>    | <i>gl</i> | <i>Epac</i>       | <i>scrt</i> | <i>aop</i>        |
| <i>gl</i> | <i>ato</i>     | <i>gl</i> | <i>eya</i>        | <i>scrt</i> | <i>ato</i>        |
| <i>gl</i> | <i>Awh</i>     | <i>gl</i> | <i>fas</i>        | <i>scrt</i> | <i>Awh</i>        |
| <i>gl</i> | <i>B-H2</i>    | <i>gl</i> | <i>gl</i>         | <i>scrt</i> | <i>betaTub60D</i> |
| <i>gl</i> | <i>Cad88C</i>  | <i>gl</i> | <i>gogo</i>       | <i>scrt</i> | <i>B-H2</i>       |
| <i>gl</i> | <i>CadN</i>    | <i>gl</i> | <i>gsb-n</i>      | <i>scrt</i> | <i>CadN</i>       |
| <i>gl</i> | <i>CG12594</i> | <i>gl</i> | <i>H15</i>        | <i>scrt</i> | <i>Chp53E</i>     |
| <i>gl</i> | <i>CG12605</i> | <i>gl</i> | <i>Hmx</i>        | <i>scrt</i> | <i>CG12594</i>    |
| <i>gl</i> | <i>CG13830</i> | <i>gl</i> | <i>Hr46</i>       | <i>scrt</i> | <i>CG12605</i>    |
| <i>gl</i> | <i>CG13894</i> | <i>gl</i> | <i>ia2</i>        | <i>scrt</i> | <i>CG13560</i>    |
| <i>gl</i> | <i>CG14075</i> | <i>gl</i> | <i>inaC</i>       | <i>scrt</i> | <i>CG13650</i>    |
| <i>gl</i> | <i>CG14516</i> | <i>gl</i> | <i>jeb</i>        | <i>scrt</i> | <i>CG13928</i>    |
| <i>gl</i> | <i>CG15097</i> | <i>gl</i> | <i>kirre</i>      | <i>scrt</i> | <i>CG14075</i>    |
| <i>gl</i> | <i>CG15630</i> | <i>gl</i> | <i>klg</i>        | <i>scrt</i> | <i>CG15097</i>    |
| <i>gl</i> | <i>CG17739</i> | <i>gl</i> | <i>Lim3</i>       | <i>scrt</i> | <i>CG15630</i>    |
| <i>gl</i> | <i>CG17816</i> | <i>gl</i> | <i>lz</i>         | <i>scrt</i> | <i>CG18304</i>    |
| <i>gl</i> | <i>CG2781</i>  | <i>gl</i> | <i>m4</i>         | <i>scrt</i> | <i>CG2781</i>     |
| <i>gl</i> | <i>CG30419</i> | <i>gl</i> | <i>Mmp2</i>       | <i>scrt</i> | <i>CG30419</i>    |
| <i>gl</i> | <i>CG30471</i> | <i>gl</i> | <i>neur</i>       | <i>scrt</i> | <i>CG31176</i>    |
| <i>gl</i> | <i>CG31176</i> | <i>gl</i> | <i>nimA</i>       | <i>scrt</i> | <i>CG31221</i>    |
| <i>gl</i> | <i>CG31291</i> | <i>gl</i> | <i>Nrt</i>        | <i>scrt</i> | <i>CG31291</i>    |
| <i>gl</i> | <i>CG31619</i> | <i>gl</i> | <i>oc</i>         | <i>scrt</i> | <i>CG31619</i>    |
| <i>gl</i> | <i>CG32638</i> | <i>gl</i> | <i>Optix</i>      | <i>scrt</i> | <i>CG32354</i>    |
| <i>gl</i> | <i>CG34391</i> | <i>gl</i> | <i>phm</i>        | <i>scrt</i> | <i>CG33463</i>    |
| <i>gl</i> | <i>CG3814</i>  | <i>gl</i> | <i>phyl</i>       | <i>scrt</i> | <i>CG34391</i>    |
| <i>gl</i> | <i>CG4341</i>  | <i>gl</i> | <i>pncr003:2L</i> | <i>scrt</i> | <i>CG42251</i>    |
| <i>gl</i> | <i>CG4395</i>  | <i>gl</i> | <i>pnt</i>        | <i>scrt</i> | <i>CG42322</i>    |

|             |                 |             |                   |              |                  |
|-------------|-----------------|-------------|-------------------|--------------|------------------|
| <i>scrt</i> | <i>CG42390</i>  | <i>scrt</i> | <i>nrv3</i>       | <i>SoxN</i>  | <i>slp1</i>      |
| <i>scrt</i> | <i>CG42749</i>  | <i>scrt</i> | <i>pgant2</i>     | <i>SoxN</i>  | <i>SoxN</i>      |
| <i>scrt</i> | <i>CG4341</i>   | <i>scrt</i> | <i>phyl</i>       | <i>Su(H)</i> | <i>a</i>         |
| <i>scrt</i> | <i>CG6024</i>   | <i>scrt</i> | <i>pncr002:3R</i> | <i>Su(H)</i> | <i>aop</i>       |
| <i>scrt</i> | <i>CG6327</i>   | <i>scrt</i> | <i>pnt</i>        | <i>Su(H)</i> | <i>ato</i>       |
| <i>scrt</i> | <i>CG7991</i>   | <i>scrt</i> | <i>qtc</i>        | <i>Su(H)</i> | <i>Cbp53E</i>    |
| <i>scrt</i> | <i>CG8216</i>   | <i>scrt</i> | <i>qua</i>        | <i>Su(H)</i> | <i>CG15097</i>   |
| <i>scrt</i> | <i>CG8910</i>   | <i>scrt</i> | <i>Rab3</i>       | <i>Su(H)</i> | <i>CG31176</i>   |
| <i>scrt</i> | <i>CG9134</i>   | <i>scrt</i> | <i>rdo</i>        | <i>Su(H)</i> | <i>CG31676</i>   |
| <i>scrt</i> | <i>CG9363</i>   | <i>scrt</i> | <i>retn</i>       | <i>Su(H)</i> | <i>CG42390</i>   |
| <i>scrt</i> | <i>comm</i>     | <i>scrt</i> | <i>rho</i>        | <i>Su(H)</i> | <i>CG42492</i>   |
| <i>scrt</i> | <i>CR30009</i>  | <i>scrt</i> | <i>ru</i>         | <i>Su(H)</i> | <i>CG8910</i>    |
| <i>scrt</i> | <i>cu</i>       | <i>scrt</i> | <i>scrt</i>       | <i>Su(H)</i> | <i>CR30009</i>   |
| <i>scrt</i> | <i>dac</i>      | <i>scrt</i> | <i>sNPF</i>       | <i>Su(H)</i> | <i>D</i>         |
| <i>scrt</i> | <i>dan</i>      | <i>scrt</i> | <i>so</i>         | <i>Su(H)</i> | <i>DAT</i>       |
| <i>scrt</i> | <i>DAT</i>      | <i>scrt</i> | <i>SoxN</i>       | <i>Su(H)</i> | <i>Dfd</i>       |
| <i>scrt</i> | <i>Dfd</i>      | <i>scrt</i> | <i>spir</i>       | <i>Su(H)</i> | <i>Dif</i>       |
| <i>scrt</i> | <i>Dif</i>      | <i>scrt</i> | <i>stj</i>        | <i>Su(H)</i> | <i>disco-r</i>   |
| <i>scrt</i> | <i>disco-r</i>  | <i>scrt</i> | <i>stops</i>      | <i>Su(H)</i> | <i>eya</i>       |
| <i>scrt</i> | <i>dpr10</i>    | <i>scrt</i> | <i>Syt1</i>       | <i>Su(H)</i> | <i>fas</i>       |
| <i>scrt</i> | <i>Dscam3</i>   | <i>scrt</i> | <i>Sytalpa</i>    | <i>Su(H)</i> | <i>gl</i>        |
| <i>scrt</i> | <i>eya</i>      | <i>scrt</i> | <i>Teh1</i>       | <i>Su(H)</i> | <i>HLHmgamma</i> |
| <i>scrt</i> | <i>fas</i>      | <i>scrt</i> | <i>tej</i>        | <i>Su(H)</i> | <i>Hmx</i>       |
| <i>scrt</i> | <i>gl</i>       | <i>scrt</i> | <i>toy</i>        | <i>Su(H)</i> | <i>inaC</i>      |
| <i>scrt</i> | <i>gogo</i>     | <i>scrt</i> | <i>Traf4</i>      | <i>Su(H)</i> | <i>jeb</i>       |
| <i>scrt</i> | <i>gsb-n</i>    | <i>scrt</i> | <i>tutl</i>       | <i>Su(H)</i> | <i>kirre</i>     |
| <i>scrt</i> | <i>H15</i>      | <i>scrt</i> | <i>X11Lbeta</i>   | <i>Su(H)</i> | <i>m4</i>        |
| <i>scrt</i> | <i>hiw</i>      | <i>SoxN</i> | <i>amon</i>       | <i>Su(H)</i> | <i>nerfin-1</i>  |
| <i>scrt</i> | <i>Hmx</i>      | <i>SoxN</i> | <i>CG11073</i>    | <i>Su(H)</i> | <i>neur</i>      |
| <i>scrt</i> | <i>Hr46</i>     | <i>SoxN</i> | <i>CG12071</i>    | <i>Su(H)</i> | <i>nimA</i>      |
| <i>scrt</i> | <i>inaC</i>     | <i>SoxN</i> | <i>CG12605</i>    | <i>Su(H)</i> | <i>phyl</i>      |
| <i>scrt</i> | <i>ia2</i>      | <i>SoxN</i> | <i>CG15630</i>    | <i>Su(H)</i> | <i>pnt</i>       |
| <i>scrt</i> | <i>jdp</i>      | <i>SoxN</i> | <i>CG30419</i>    | <i>Su(H)</i> | <i>pros</i>      |
| <i>scrt</i> | <i>jeb</i>      | <i>SoxN</i> | <i>CG31176</i>    | <i>Su(H)</i> | <i>PsGEF</i>     |
| <i>scrt</i> | <i>kirre</i>    | <i>SoxN</i> | <i>Dscam3</i>     | <i>Su(H)</i> | <i>qua</i>       |
| <i>scrt</i> | <i>klg</i>      | <i>SoxN</i> | <i>ey</i>         | <i>Su(H)</i> | <i>retn</i>      |
| <i>scrt</i> | <i>lab</i>      | <i>SoxN</i> | <i>gl</i>         | <i>Su(H)</i> | <i>rho</i>       |
| <i>scrt</i> | <i>Lim3</i>     | <i>SoxN</i> | <i>Hmx</i>        | <i>Su(H)</i> | <i>run</i>       |
| <i>scrt</i> | <i>m4</i>       | <i>SoxN</i> | <i>Lim3</i>       | <i>Su(H)</i> | <i>Teh1</i>      |
| <i>scrt</i> | <i>Mmp2</i>     | <i>SoxN</i> | <i>oc</i>         | <i>Su(H)</i> | <i>Traf4</i>     |
| <i>scrt</i> | <i>nerfin-1</i> | <i>SoxN</i> | <i>ru</i>         | <i>Su(H)</i> | <i>tutl</i>      |
| <i>scrt</i> | <i>neur</i>     | <i>SoxN</i> | <i>scrt</i>       |              |                  |

**Table S5: Conserved Glass targetome. Eye-enriched genes across species predicted as Glass target genes *and* significantly down-regulated in gl[60j] versus *D.melanogaster* wild-type.**

| Gene Name      | <i>D.melanogaster</i><br>Gene FBgn | <i>D.melanogaster</i><br>wild-type | <i>D.yakuba</i><br>wild-type | <i>D.virilis</i><br>wild-type | gl[60j] | Gl[60j]<br><i>Pvalue</i> | Gl[60j]<br><i>Padj</i> | cisTargetX<br>predicted glass binding region |
|----------------|------------------------------------|------------------------------------|------------------------------|-------------------------------|---------|--------------------------|------------------------|----------------------------------------------|
| <i>CG14075</i> | FBgn0036835                        | 6.97                               | NA                           | 4.31                          | -10.00  | 8.39E-114                | 3.67E-111              | chr3L:18976192-18978113                      |
| <i>CG5653</i>  | FBgn0035943                        | 4.14                               | 4.25                         | 2.96                          | -8.80   | 3.80E-223                | 4.16E-220              | chr3L:8959462-8959760                        |
| <i>inaC</i>    | FBgn0004784                        | 5.02                               | 2.77                         | 6.01                          | -8.68   | 2.06E-179                | 2.00E-176              | chr2R:12783842-12786149                      |
| <i>CG9935</i>  | FBgn0039916                        | 5.15                               | 5.01                         | 3.51                          | -6.37   | 4.10E-237                | 7.17E-234              | chr4:667146-667344                           |
| <i>CG9150</i>  | FBgn0031775                        | 0.11                               | 5.75                         | -1.21                         | -5.02   | 3.88E-65                 | 5.06E-63               | chr2L:6068579-6069220                        |
| <i>chp</i>     | FBgn0000313                        | 3.54                               | 4.51                         | 6.85                          | -4.44   | 0                        | 0                      | chr3R:27035441-27035982                      |
| <i>Sytalpa</i> | FBgn0261089                        | 2.13                               | 1.56                         | 1.20                          | -3.65   | 1.01E-29                 | 3.78E-28               | chr2L:17595313-17596866                      |
| <i>dpr9</i>    | FBgn0038282                        | 4.53                               | 2.33                         | 4.50                          | -2.85   | 3.77E-55                 | 3.74E-53               | chr3R:10892805-10893925                      |
| <i>Cad88C</i>  | FBgn0038247                        | 4.04                               | 2.24                         | 0.92                          | -2.82   | 5.94E-115                | 2.73E-112              | chr3R:10455668-10456947                      |
| <i>CG31619</i> | FBgn0051619                        | 3.89                               | 3.70                         | 2.90                          | -2.75   | 1.80E-140                | 1.31E-137              | chr2L:21699086-21700671                      |
| <i>dpr10</i>   | FBgn0052057                        | 2.49                               | 3.60                         | 1.43                          | -2.67   | 3.44E-25                 | 1.02E-23               | chr3L:10150740-10152379                      |
|                |                                    |                                    |                              |                               |         |                          |                        | chr3L:10166262-10167555                      |
| <i>jeb</i>     | FBgn0086677                        | 4.14                               | 2.87                         | 2.29                          | -2.58   | 1.05E-79                 | 2.03E-77               | chr2R:8005565-8007491                        |
| <i>CG3814</i>  | FBgn0025692                        | 2.42                               | 2.15                         | 1.75                          | -2.42   | 1.27E-042                | 8.13E-043              | chr2R:8764295-8765159                        |
| <i>ia2</i>     | FBgn0031294                        | 5.89                               | -0.93                        | 6.35                          | -2.38   | 0.00E+000                | 0.00E+000              | chr2L:1046329-1047548                        |
|                |                                    |                                    |                              |                               |         |                          |                        | chr2L:1029518-1032768                        |
|                |                                    |                                    |                              |                               |         |                          |                        | chr2L:1038422-1039823                        |
| <i>CG12594</i> | FBgn0037941                        | 3.80                               | 0.44                         | 4.05                          | -2.29   | 6.87E-22                 | 1.62E-20               | chr3R:7546101-7547562                        |
| <i>Dscam3</i>  | FBgn0261046                        | 2.01                               | 5.48                         | 3.93                          | -2.24   | 1.94E-70                 | 2.99E-68               | chr3R:13324027-13325413                      |

|                |             |      |       |      |       |          |          |                         |
|----------------|-------------|------|-------|------|-------|----------|----------|-------------------------|
|                |             |      |       |      |       |          |          | chr3R:13334232-13335138 |
| <i>CG17739</i> | FBgn0033710 | 2.41 | 2.10  | 3.33 | -2.15 | 3.32E-32 | 1.40E-30 | chr2R:8194164-8194792   |
| <i>Lim3</i>    | FBgn0002023 | 3.73 | 2.97  | 3.67 | -2.07 | 3.66E-34 | 1.72E-32 | chr2L:19085176-19086688 |
|                |             |      |       |      |       |          |          | chr2L:19102852-19104157 |
| <i>tau</i>     | FBgn0051057 | 5.59 | 1.87  | 3.33 | -1.92 | 9.48E-47 | 7.03E-45 | chr3R:23476471-23477585 |
|                |             |      |       |      |       |          |          | chr3R:23479049-23481095 |
| <i>amon</i>    | FBgn0023179 | 4.89 | 1.72  | 4.59 | -1.89 | 1.41E-42 | 8.43E-41 | chr3R:22530095-22531144 |
|                |             |      |       |      |       |          |          | chr3R:22533998-22535391 |
| <i>retn</i>    | FBgn0004795 | 6.82 | 5.18  | 3.83 | -1.81 | 3.57E-65 | 4.73E-63 | chr2R:19514693-19515935 |
|                |             |      |       |      |       |          |          | chr2R:19523270-19524801 |
| <i>CG7991</i>  | FBgn0035260 | 3.52 | 1.75  | 3.85 | -1.80 | 2.74E-41 | 1.56E-39 | chr3L:1679635-1680795   |
| <i>lz</i>      | FBgn0002576 | 6.38 | 3.99  | 4.50 | -1.75 | 1.68E-51 | 1.40E-49 | chrX:9180815-9181775    |
| <i>dmrt99B</i> | FBgn0039683 | 2.71 | 3.51  | 6.56 | -1.72 | 1.54E-18 | 2.99E-17 | chr3R:25514163-25515780 |
| <i>fas</i>     | FBgn0000633 | 3.80 | -0.04 | 4.05 | -1.71 | 2.67E-31 | 1.07E-29 | chr2R:9527732-9529592   |
|                |             |      |       |      |       |          |          | chr2R:9537569-9539962   |
|                |             |      |       |      |       |          |          | chr2R:9546761-9549179   |
| <i>SytI</i>    | FBgn0004242 | 0.94 | 1.52  | 5.65 | -1.71 | 6.80E-51 | 5.51E-49 | chr2L:2793888-2794819   |
| <i>scrt</i>    | FBgn0004880 | 5.97 | 5.04  | 7.05 | -1.68 | 4.72E-59 | 5.23E-57 | chr3L:3978149-3979559   |
|                |             |      |       |      |       |          |          | chr3L:3981801-3982640   |
| <i>CG13830</i> | FBgn0039054 | 3.80 | 2.39  | 1.77 | -1.68 | 1.16E-62 | 1.43E-60 | chr3R:18932619-18933865 |
|                |             |      |       |      |       |          |          | chr3R:18936623-18937928 |
|                |             |      |       |      |       |          |          | chr3R:18938656-18940394 |



|                |             |      |      |       |       |          |          |                         |
|----------------|-------------|------|------|-------|-------|----------|----------|-------------------------|
| <b>CG34391</b> | FBgn0085420 | 4.89 | 2.14 | 2.29  | -1.66 | 8.29E-11 | 9.06E-10 | chr3L:5423645-5424733   |
| <b>CG6329</b>  | FBgn0033872 | 4.68 | 0.73 | 3.78  | -1.66 | 9.73E-43 | 5.95E-41 | chr2R:9715391-9716094   |
| <b>pros</b>    | FBgn0004595 | 2.22 | 1.77 | 4.05  | -1.59 | 2.14E-52 | 1.91E-50 | chr3R:7191333-7193469   |
|                |             |      |      |       |       |          |          | chr3R:7202998-7203728   |
| <b>CG4341</b>  | FBgn0028481 | 4.59 | 3.51 | 3.66  | -1.58 | 3.48E-30 | 1.33E-28 | chr2L:930423-931744     |
|                |             |      |      |       |       |          |          | chr2L:943500-945037     |
| <b>CG8910</b>  | FBgn0025833 | 3.15 | 1.62 | 5.41  | -1.51 | 2.45E-12 | 3.04E-11 | chr2R:1276554212767777  |
|                |             |      |      |       |       |          |          | chr2R:12772005-12773682 |
|                |             |      |      |       |       |          |          | chr2R:12775699-12777015 |
| <b>Epac</b>    | FBgn0085421 | 2.29 | 2.49 | 2.29  | -1.45 | 7.54E-17 | 1.31E-15 | chr2R:2670842-2672958   |
| <b>CG32638</b> | FBgn0052638 | 2.08 | 1.89 | 1.22  | -1.43 | 2.00E-40 | 1.10E-38 | chrX:13020247-13021312  |
| <b>nimA</b>    | FBgn0261514 | 2.83 | 5.41 | -0.78 | -1.43 | 6.32E-14 | 8.90E-13 | chr2L:13958152-13958881 |
| <b>CG12605</b> | FBgn0035481 | 5.59 | 3.46 | 1.78  | -1.35 | 2.07E-26 | 6.52E-25 | chr3L:3968149-3969195   |
| <b>gl</b>      | FBgn0004618 | 8.34 | 5.03 | 8.10  | -1.27 | 2.11E-35 | 1.01E-33 | chr3R:14199286-14201326 |
| <b>gogo</b>    | FBgn0052227 | 3.22 | 3.61 | 3.96  | -1.25 | 1.47E-33 | 6.80E-32 | chr3L:20287914-20288944 |
| <b>Rbp9</b>    | FBgn0010263 | 1.56 | 0.76 | 1.71  | -1.12 | 1.04E-07 | 8.13E-07 | chr2L:2959916-2961230   |
| <b>CG14516</b> | FBgn0039640 | 5.64 | 5.03 | 4.36  | -1.12 | 5.15E-27 | 1.67E-25 | chr3R:24967291-24967931 |
| <b>sNPF</b>    | FBgn0032840 | 4.80 | 2.57 | 5.06  | -1.10 | 1.85E-09 | 1.80E-08 | chr2L:20029536-20030549 |
| <b>CG15097</b> | FBgn0034396 | 2.62 | 2.90 | 2.52  | -1.06 | 5.70E-14 | 8.05E-13 | chr2R:14714225-14715260 |
|                |             |      |      |       |       |          |          | chr2R:14717446-14718750 |
| <b>unc-104</b> | FBgn0034155 | 1.98 | 2.14 | 2.48  | -1.04 | 1.96E-24 | 5.58E-23 | chr2R:12652314-12652894 |
|                |             |      |      |       |       |          |          | chr2R:12657913-12658973 |
| <b>Hmx</b>     | FBgn0085448 | 4.48 | 6.43 | 4.26  | -1.03 | 8.51E-10 | 8.53E-09 | chr3R:13387092-13389664 |

|                |             |      |      |      |       |          |          |                         |
|----------------|-------------|------|------|------|-------|----------|----------|-------------------------|
|                |             |      |      |      |       |          |          | chr3R:13389665-13390518 |
| <i>DAT</i>     | FBgn0034136 | 3.89 | 4.20 | 5.29 | -1.01 | 3.99E-05 | 0.0002   | chr2R:12449980-12451275 |
| <i>Syt7</i>    | FBgn0039900 | 5.79 | 2.49 | 2.63 | -0.98 | 7.25E-11 | 7.95E-10 | chr4:311864-314134      |
| <i>CG17816</i> | FBgn0037525 | 2.96 | 0.51 | 4.81 | -0.94 | 8.06E-18 | 1.49E-16 | chr3R:3701041-3701845   |
| <i>CG6024</i>  | FBgn0036202 | 4.07 | 3.86 | 4.88 | -0.91 | 1.05E-18 | 2.07E-17 | chr3L:11751117-11751844 |
|                |             |      |      |      |       |          |          | chr3L:11754456-11755537 |
| <i>CG15630</i> | FBgn0031627 | 4.91 | 3.04 | 4.05 | -0.80 | 1.20E-09 | 1.19E-08 | chr2L:4763438-4764796   |
|                |             |      |      |      |       |          |          | chr2L:4766233-4767285   |
|                |             |      |      |      |       |          |          | chr2L:4770866-4773315   |
| <i>Teh1</i>    | FBgn0037766 | 0.45 | 0.14 | 3.93 | -0.79 | 0.0079   | 0.0247   | chr3R:5682324-5683532   |
| <i>CG31291</i> | FBgn0051291 | 3.60 | 3.51 | 1.20 | -0.72 | 0.0001   | 0.0006   | chr3R:11746270-11748484 |
| <i>CadN</i>    | FBgn0015609 | 3.17 | 1.16 | 4.08 | -0.72 | 6.67E-12 | 7.99E-11 | chr2L:17721104-17723799 |
| <i>rdo</i>     | FBgn0243486 | 1.20 | 2.24 | 3.45 | -0.67 | 8.84E-11 | 9.64E-10 | chr2L:18013311-18014362 |
|                |             |      |      |      |       |          |          | chr2L:18022951-18024321 |
|                |             |      |      |      |       |          |          | chr2L:18033883-18036251 |
| <i>CG31176</i> | FBgn0051176 | 5.72 | 4.02 | 2.90 | -0.53 | 0.0003   | 0.0013   | chr3R:17503347-17504463 |
|                |             |      |      |      |       |          |          | chr3R:17505224-17505941 |
|                |             |      |      |      |       |          |          | chr3R:17507016-17507973 |
|                |             |      |      |      |       |          |          | chr3R:17507974-17508959 |
|                |             |      |      |      |       |          |          | chr3R:17533316-17534391 |
|                |             |      |      |      |       |          |          | chr3R:17534392-17535455 |
|                |             |      |      |      |       |          |          | chr3R:17539746-17541493 |
|                |             |      |      |      |       |          |          | chr3R:17546238-17547251 |

|                |             |      |      |      |       |          |          |                         |
|----------------|-------------|------|------|------|-------|----------|----------|-------------------------|
| <b>CG9363</b>  | FBgn0037697 | 1.98 | 2.72 | 1.88 | -0.53 | 2.56E-06 | 1.66E-05 | chr3R:5286715-5290474   |
| <b>tutl</b>    | FBgn0010473 | 1.82 | 1.14 | 1.34 | -0.52 | 7.90E-07 | 5.53E-06 | chr2L:4283978-4286386   |
|                |             |      |      |      |       |          |          | chr2L:4287272-4289013   |
| <b>kirre</b>   | FBgn0028369 | 1.81 | 2.30 | 1.18 | -0.51 | 3.60E-05 | 0.0002   | chrX:2874471-2875512    |
|                |             |      |      |      |       |          |          | chrX:2894636-2896901    |
|                |             |      |      |      |       |          |          | chrX:2901563-2902587    |
|                |             |      |      |      |       |          |          | chrX:2904224-2905113    |
|                |             |      |      |      |       |          |          | chrX:2918585-2919771    |
|                |             |      |      |      |       |          |          | chrX:2944731-2945464    |
|                |             |      |      |      |       |          |          | chrX:2976182-2977483    |
|                |             |      |      |      |       |          |          | chrX:3010832-3011921    |
| <b>Nrt</b>     | FBgn0004108 | 2.72 | 2.38 | 2.45 | -0.46 | 1.76E-05 | 0.0001   | chr3L:16754263-16755474 |
|                |             |      |      |      |       |          |          | chr3L:16756323-16757832 |
|                |             |      |      |      |       |          |          | chr3L:16759811-16761602 |
| <b>CG13894</b> | FBgn0035157 | 2.15 | 2.14 | 1.10 | -0.43 | 0.0002   | 0.0008   | chr3L:699372-700357     |
| <b>CG9335</b>  | FBgn0032895 | NA   | 3.11 | 9.83 | -0.29 | 0.004    | 0.0142   | chr2L:20853546-20854710 |
| <b>neur</b>    | FBgn0002932 | 1.20 | 2.30 | 2.00 | -0.28 | 0.006    | 0.0202   | chr3R:4859710-4860476   |

**Table S6: Motif enrichment in various gene sets**

| <b>Gene sets</b>                                                                                | <b>Candidate Tfs/ motifs</b> |
|-------------------------------------------------------------------------------------------------|------------------------------|
| Top 25                                                                                          | GL, KNI, ABD-B, OC           |
| Top75                                                                                           | GL, SCRT, SOXNN, CG14962, EY |
| Top 100                                                                                         | GL, SCRT, SOXNN, SU(H)       |
| Top 245                                                                                         | GL, SCRT, SOXN, SU(H)        |
| Top 545                                                                                         | TRL, GL, SCRT, SU(H), HR46   |
| 96 predicted Glass targets                                                                      | GL, PNT, SCRT                |
| 62 Glass targets significantly down-regulated in <i>gl</i> <sup>-/-</sup>                       | TRL, H, GRH                  |
| 34 Glass targets no strongly down-regulated in the <i>gl</i> <sup>-/-</sup>                     | GL, DA, PNT                  |
| Intersection top 245 genes and genes up-regulated in <i>ato</i> -GOF (Aerts <i>et al.</i> 2010) | SCRT, GL, SU(H), ATO         |
| Intersection top 245 and predicted EY targets (Ostrin <i>et al.</i> 2006)                       | E(SPL) DEAF1, OC             |
| Eye-enriched genes eye-antennal (inhouse) vs L3 larva (modencode consortium)                    | SIX/Optix, EY                |
